# Supplementary material for: Systematic review of outbreaks of COVID-19 within households in the European region when the child is the index case
Source: HighWire-hosted journal article supplement (doi:10.1136/bmjpo-2022-001718), 2023-01-01
Supplement: bmjpo-2022-001718supp001_data_supplement.pdf [file bmjpo-2022-001718supp001_data_supplement.pdf]

**Supplementary Table 1: Search strategies for identifying studies**

Database: Ovid MEDLINE(R) ALL &lt;1946 to January 19, 2022&gt;

| KEY TERMS                                                                                                                                                                                                                                                                                                                                                                                                                                                                                                                                                                                                                                                                                                                                                                                                                                                                                                                                                                                                                                                                                                                                                                                                                                                                                                                                                                     | HITS    |
|-------------------------------------------------------------------------------------------------------------------------------------------------------------------------------------------------------------------------------------------------------------------------------------------------------------------------------------------------------------------------------------------------------------------------------------------------------------------------------------------------------------------------------------------------------------------------------------------------------------------------------------------------------------------------------------------------------------------------------------------------------------------------------------------------------------------------------------------------------------------------------------------------------------------------------------------------------------------------------------------------------------------------------------------------------------------------------------------------------------------------------------------------------------------------------------------------------------------------------------------------------------------------------------------------------------------------------------------------------------------------------|---------|
| 1 exp Coronavirus/                                                                                                                                                                                                                                                                                                                                                                                                                                                                                                                                                                                                                                                                                                                                                                                                                                                                                                                                                                                                                                                                                                                                                                                                                                                                                                                                                            | 4887    |
| 2 Coronaviridae Infections/ or Coronaviridae/ or SARS-CoV-2/ or COVID-19/                                                                                                                                                                                                                                                                                                                                                                                                                                                                                                                                                                                                                                                                                                                                                                                                                                                                                                                                                                                                                                                                                                                                                                                                                                                                                                     | 137004  |
| 3 Betacoronavirus 1/ or Betacoronavirus/                                                                                                                                                                                                                                                                                                                                                                                                                                                                                                                                                                                                                                                                                                                                                                                                                                                                                                                                                                                                                                                                                                                                                                                                                                                                                                                                      | 33283   |
| 4 Coronavirus Infections/                                                                                                                                                                                                                                                                                                                                                                                                                                                                                                                                                                                                                                                                                                                                                                                                                                                                                                                                                                                                                                                                                                                                                                                                                                                                                                                                                     | 45290   |
| 5 SARS Virus/                                                                                                                                                                                                                                                                                                                                                                                                                                                                                                                                                                                                                                                                                                                                                                                                                                                                                                                                                                                                                                                                                                                                                                                                                                                                                                                                                                 | 4007    |
| 6 Severe Acute Respiratory Syndrome/                                                                                                                                                                                                                                                                                                                                                                                                                                                                                                                                                                                                                                                                                                                                                                                                                                                                                                                                                                                                                                                                                                                                                                                                                                                                                                                                          | 5658    |
| 7 ((severe adj acute adj respiratory adj syndrome) or SARs or Sars-cov or ((sars-associated or sars-related) adj (cov or coronavirus))).mp.                                                                                                                                                                                                                                                                                                                                                                                                                                                                                                                                                                                                                                                                                                                                                                                                                                                                                                                                                                                                                                                                                                                                                                                                                                   | 152979  |
| 8 SARS-CoV-2/                                                                                                                                                                                                                                                                                                                                                                                                                                                                                                                                                                                                                                                                                                                                                                                                                                                                                                                                                                                                                                                                                                                                                                                                                                                                                                                                                                 | 105907  |
| 9 exp Coronavirus/ or exp Coronavirus Infections/                                                                                                                                                                                                                                                                                                                                                                                                                                                                                                                                                                                                                                                                                                                                                                                                                                                                                                                                                                                                                                                                                                                                                                                                                                                                                                                             | 151122  |
| 10 (Coronavir* or nCov or covid or covid-19).ti,ab,kf.                                                                                                                                                                                                                                                                                                                                                                                                                                                                                                                                                                                                                                                                                                                                                                                                                                                                                                                                                                                                                                                                                                                                                                                                                                                                                                                        | 216182  |
| 11 Coronavirus OC43, Human/                                                                                                                                                                                                                                                                                                                                                                                                                                                                                                                                                                                                                                                                                                                                                                                                                                                                                                                                                                                                                                                                                                                                                                                                                                                                                                                                                   | 269     |
| 12 HKU1.mp.                                                                                                                                                                                                                                                                                                                                                                                                                                                                                                                                                                                                                                                                                                                                                                                                                                                                                                                                                                                                                                                                                                                                                                                                                                                                                                                                                                   | 490     |
| 13 HCV-OC43.mp.                                                                                                                                                                                                                                                                                                                                                                                                                                                                                                                                                                                                                                                                                                                                                                                                                                                                                                                                                                                                                                                                                                                                                                                                                                                                                                                                                               | 37      |
| 14 (("2019" adj (novel or new) adj corona*) or ("2019" adj (CoV or nCoV)) or (coronavirus adj (disease adj "2019")) or COVID19 or COVID-19 or ((Novel or New) adj Corona*) or SARS2 or SARS-CoV-2 or (SARS adj2 (coronaviridae or coronavirus)) or ((sars or Coronavirus) adj "2") or nCov or 2019ncov).mp.                                                                                                                                                                                                                                                                                                                                                                                                                                                                                                                                                                                                                                                                                                                                                                                                                                                                                                                                                                                                                                                                   | 221107  |
| 15 or/1-14                                                                                                                                                                                                                                                                                                                                                                                                                                                                                                                                                                                                                                                                                                                                                                                                                                                                                                                                                                                                                                                                                                                                                                                                                                                                                                                                                                    | 244428  |
| 16 (attack rate* or (secondary adj2 attack rate*) or (contact adj2 attack rate*)).mp.                                                                                                                                                                                                                                                                                                                                                                                                                                                                                                                                                                                                                                                                                                                                                                                                                                                                                                                                                                                                                                                                                                                                                                                                                                                                                         | 4942    |
| 17 Contact Tracing/ or contact*.mp. or (contact* adj1 transmission*).mp.                                                                                                                                                                                                                                                                                                                                                                                                                                                                                                                                                                                                                                                                                                                                                                                                                                                                                                                                                                                                                                                                                                                                                                                                                                                                                                      | 451220  |
| 18 (cluster* or close*adj1 contact*).mp.                                                                                                                                                                                                                                                                                                                                                                                                                                                                                                                                                                                                                                                                                                                                                                                                                                                                                                                                                                                                                                                                                                                                                                                                                                                                                                                                      | 452890  |
| 19 (second* adj transmission*).mp.                                                                                                                                                                                                                                                                                                                                                                                                                                                                                                                                                                                                                                                                                                                                                                                                                                                                                                                                                                                                                                                                                                                                                                                                                                                                                                                                            | 630     |
| 20 (contact adj transmission).mp.                                                                                                                                                                                                                                                                                                                                                                                                                                                                                                                                                                                                                                                                                                                                                                                                                                                                                                                                                                                                                                                                                                                                                                                                                                                                                                                                             | 500     |
| 21 ((transmit* adj1 rate*) or (transmiss* adj1 rate*)).mp.                                                                                                                                                                                                                                                                                                                                                                                                                                                                                                                                                                                                                                                                                                                                                                                                                                                                                                                                                                                                                                                                                                                                                                                                                                                                                                                    | 5830    |
| 22 or/16-21                                                                                                                                                                                                                                                                                                                                                                                                                                                                                                                                                                                                                                                                                                                                                                                                                                                                                                                                                                                                                                                                                                                                                                                                                                                                                                                                                                   | 901306  |
| 23 family.mp.                                                                                                                                                                                                                                                                                                                                                                                                                                                                                                                                                                                                                                                                                                                                                                                                                                                                                                                                                                                                                                                                                                                                                                                                                                                                                                                                                                 | 1084846 |
| 24 relatives.mp.                                                                                                                                                                                                                                                                                                                                                                                                                                                                                                                                                                                                                                                                                                                                                                                                                                                                                                                                                                                                                                                                                                                                                                                                                                                                                                                                                              | 63350   |
| 25 house*.mp.                                                                                                                                                                                                                                                                                                                                                                                                                                                                                                                                                                                                                                                                                                                                                                                                                                                                                                                                                                                                                                                                                                                                                                                                                                                                                                                                                                 | 215827  |
| 26 home.mp.                                                                                                                                                                                                                                                                                                                                                                                                                                                                                                                                                                                                                                                                                                                                                                                                                                                                                                                                                                                                                                                                                                                                                                                                                                                                                                                                                                   | 277244  |
| 27 or/23-26                                                                                                                                                                                                                                                                                                                                                                                                                                                                                                                                                                                                                                                                                                                                                                                                                                                                                                                                                                                                                                                                                                                                                                                                                                                                                                                                                                   | 1527765 |
| 28 young*.mp.                                                                                                                                                                                                                                                                                                                                                                                                                                                                                                                                                                                                                                                                                                                                                                                                                                                                                                                                                                                                                                                                                                                                                                                                                                                                                                                                                                 | 1611781 |
| 29 (toddler* or preschool* or child* or pediat* or paediat* or kid or kids or prepubescen* or prepuberty* or puberty or pubescen* or teen* or young* or youth* or minors* or under ag* or underag* or juvenile* or girl* or boy* or preadolesc* or adolesc* or nursery or prekindergarten or kindergarten* or early childhood education or preschool* or elementary education or elementary school* or primary education or primary school* or K-12* or K12 or 1st-grade* or first-grade* or grade 1 or grade one or 2nd-grade* or second-grade* or grade 2 or grade two or 3rd-grade* or third-grade* or grade 3 or grade three or 4th-grade* or fourth-grade* or grade 4 or grade four or 5th-grade* or fifth-grade* or grade 5 or grade five or 6th-grade* or sixth-grade* or grade 6 or grade six or intermediate general or middle school* or secondary education or secondary school*OR 7th-grade* or seventh-grade* or grade 7 or grade seven or 8th-grade* or eight-grade* or grade 8 or grade eight or 9th-grade* or ninth-grade* or grade 9 or grade nine or 10th-grade* or tenth-grade* or grade 10 or grade ten or 11th-grade* or eleventh-grade* or grade 11 or grade eleven or 12th-grade* or twelfth-grade* or grade 12 or grade twelve or junior high* or highschool* or high school* or preuniversity or pre-university or college* or tertiary education or | 3665192 |

|                                                                                                                                                                                                                                                                                                                                                                                                                                                                                                                                                                                                                                                                                                                                                                                                                                                                                                                                                                                                                                                                                                                                                                                                                                                                                                                                                                                                                                                                                                                                                                                                                                                                                                                                                                                                                                                                                                                                                                                                                                                                                                                                                                                                                                                                                                                                                                                                                                                                                                                                                                                                                                                                                                                                                                                                                                                                                                                                                                                                                                                                                                                                                                                                                                                                                                                                                                                                                                                                                                                                                                                                                                                                                               |         |
|-----------------------------------------------------------------------------------------------------------------------------------------------------------------------------------------------------------------------------------------------------------------------------------------------------------------------------------------------------------------------------------------------------------------------------------------------------------------------------------------------------------------------------------------------------------------------------------------------------------------------------------------------------------------------------------------------------------------------------------------------------------------------------------------------------------------------------------------------------------------------------------------------------------------------------------------------------------------------------------------------------------------------------------------------------------------------------------------------------------------------------------------------------------------------------------------------------------------------------------------------------------------------------------------------------------------------------------------------------------------------------------------------------------------------------------------------------------------------------------------------------------------------------------------------------------------------------------------------------------------------------------------------------------------------------------------------------------------------------------------------------------------------------------------------------------------------------------------------------------------------------------------------------------------------------------------------------------------------------------------------------------------------------------------------------------------------------------------------------------------------------------------------------------------------------------------------------------------------------------------------------------------------------------------------------------------------------------------------------------------------------------------------------------------------------------------------------------------------------------------------------------------------------------------------------------------------------------------------------------------------------------------------------------------------------------------------------------------------------------------------------------------------------------------------------------------------------------------------------------------------------------------------------------------------------------------------------------------------------------------------------------------------------------------------------------------------------------------------------------------------------------------------------------------------------------------------------------------------------------------------------------------------------------------------------------------------------------------------------------------------------------------------------------------------------------------------------------------------------------------------------------------------------------------------------------------------------------------------------------------------------------------------------------------------------------------------|---------|
| tertiary school*OR postsecondary education or postsecondary school* or prevocational or vocational or classroom* or curricul* or education* or learner* or lesson* or pupil* or school* or student*).ti,ab,kf.                                                                                                                                                                                                                                                                                                                                                                                                                                                                                                                                                                                                                                                                                                                                                                                                                                                                                                                                                                                                                                                                                                                                                                                                                                                                                                                                                                                                                                                                                                                                                                                                                                                                                                                                                                                                                                                                                                                                                                                                                                                                                                                                                                                                                                                                                                                                                                                                                                                                                                                                                                                                                                                                                                                                                                                                                                                                                                                                                                                                                                                                                                                                                                                                                                                                                                                                                                                                                                                                                |         |
| 30 toddlers/ or preschool children/ or young children/ or children/ or pediatrics/ or preadolescents/ or youth/ or adolescents/ or early adolescents/ or late adolescents/ or nursery schools/ or kindergarten/ or early childhood education/ or preschool education/ or preschool teachers/ or elementary secondary education/ or grade 1/ or grade 2/ or grade 3/ or grade 4/ or grade 5/ or grade 6/ or grade 7/ or grade 8/ or grade 9/ or grade 10/ or grade 11/ or grade 12/ or elementary education/ or elementary schools/ or elementary school students/ or elementary school teachers/ or primary education/ or public schools/ or public school teachers/ or middle schools/ or middle school students/ or junior high schools/ or junior high school students/ or secondary education/ or secondary schools/ or secondary school students/ or secondary school teachers/ or high schools/ or high school students/ or college students/ or colleges/ or two year college students/ or two year college students/ or vocational education/ or vocational schools/ or students/                                                                                                                                                                                                                                                                                                                                                                                                                                                                                                                                                                                                                                                                                                                                                                                                                                                                                                                                                                                                                                                                                                                                                                                                                                                                                                                                                                                                                                                                                                                                                                                                                                                                                                                                                                                                                                                                                                                                                                                                                                                                                                                                                                                                                                                                                                                                                                                                                                                                                                                                                                                                     | 3296611 |
| 31 or/28-29                                                                                                                                                                                                                                                                                                                                                                                                                                                                                                                                                                                                                                                                                                                                                                                                                                                                                                                                                                                                                                                                                                                                                                                                                                                                                                                                                                                                                                                                                                                                                                                                                                                                                                                                                                                                                                                                                                                                                                                                                                                                                                                                                                                                                                                                                                                                                                                                                                                                                                                                                                                                                                                                                                                                                                                                                                                                                                                                                                                                                                                                                                                                                                                                                                                                                                                                                                                                                                                                                                                                                                                                                                                                                   | 4355387 |
| 32 exp Europe/                                                                                                                                                                                                                                                                                                                                                                                                                                                                                                                                                                                                                                                                                                                                                                                                                                                                                                                                                                                                                                                                                                                                                                                                                                                                                                                                                                                                                                                                                                                                                                                                                                                                                                                                                                                                                                                                                                                                                                                                                                                                                                                                                                                                                                                                                                                                                                                                                                                                                                                                                                                                                                                                                                                                                                                                                                                                                                                                                                                                                                                                                                                                                                                                                                                                                                                                                                                                                                                                                                                                                                                                                                                                                | 1507261 |
| 33 European Union/                                                                                                                                                                                                                                                                                                                                                                                                                                                                                                                                                                                                                                                                                                                                                                                                                                                                                                                                                                                                                                                                                                                                                                                                                                                                                                                                                                                                                                                                                                                                                                                                                                                                                                                                                                                                                                                                                                                                                                                                                                                                                                                                                                                                                                                                                                                                                                                                                                                                                                                                                                                                                                                                                                                                                                                                                                                                                                                                                                                                                                                                                                                                                                                                                                                                                                                                                                                                                                                                                                                                                                                                                                                                            | 17061   |
| 34 (europa or europe* or EU or EEA or Euratom or Eurozone or EEC or ECSC or Euroregion or (Schengen and (area or countr* or region* or state*))).ti,ab.                                                                                                                                                                                                                                                                                                                                                                                                                                                                                                                                                                                                                                                                                                                                                                                                                                                                                                                                                                                                                                                                                                                                                                                                                                                                                                                                                                                                                                                                                                                                                                                                                                                                                                                                                                                                                                                                                                                                                                                                                                                                                                                                                                                                                                                                                                                                                                                                                                                                                                                                                                                                                                                                                                                                                                                                                                                                                                                                                                                                                                                                                                                                                                                                                                                                                                                                                                                                                                                                                                                                       | 347879  |
| 35 (balkan* or baltic* or (mediterranean and (area or countr* or region* or state*)) or (alpine and (area* or countr* or region* or state*)) or nordic* or scandinavia* or danubian or "iberian peninsula" or "peninsula iberi*" or iberica or "iberiar peninsula" or yugoslavia or jugoslavija or jugoslavija or jugoslavia or Ceskoslovensko or "Cesko slovensko" or benelux or fennoscandia or fennoskandi or visegrad* or "grupa wyszehradzka" or "vysehradska skupina" or "vysehradska stvorkaor" or "united kingdom" or uk or britain or british or (england not new england) or english or scotland or scottish or wales or welsh or "northen ireland" or london or "east midlands" or "west midlands" or yorkshire or "east anglia" or bedfordshire or hertfordshire or essex or peterborough or cambridgeshire or norfolk or suffolk or luton or bedford or "southend on sea" or thurrock or derbyshire or nottinghamshire or leicestershire or rutland or lincolnshire or derby or leicester or northamptonshire or nottingham or "tyne and wear" or "tees valley" or durham or darlington or hartlepool or "stockton on tees" or northumberland or teesside or sunderland or cumbria or cheshire or manchester or lancashire or merseyside or blackburn or darwen or blackpool or chester or liverpool or sefton or warrington or wirral or berkshire or buckinghamshire or oxfordshire or hampshire or "isle of wight" or kent or surrey or sussex or brighton or hove or "milton keynes" or portsmouth or southampton or devon or dorset or somerset or gloucestershire or wiltshire or bath or bournemouth or poole or bristol or plymouth or swindon or torbay or herefordshire or staffordshire or birmingham or coventry or dudley or sandwell or shropshire or solihull or "stoke on trent" or telford or wrekin or walsall or warwickshire or wolverhampton or worcestershire or barnsley or doncaster or rotherham or bradford or calderdale or kirklees or kingston or leeds or sheffield or wakefield or (york not new york) or antrim or ards or armagh or ballymena or ballymoney or banbridge or carrickfergus or castlereagh or coleraine or cookstown or craigavon or (down and (district or council)) or dungannon or fermanagh or larne or limavady or lisburn or magherafelt or moyle or "newry and mourne" or newtownabbey or omagh or strabane or londonderry or tyrone or belfast or aberdeen or aberdeenshire or angus or dundee or argyll or bute or clackmannanshire or fife or ayrshire or dunbartonshire or lothian or renfrewshire or edinburgh or falkirk or glasgow or highland* or inverclyde or midlothian or moray or lanarkshire or kinross* or stirling or "orkney islands" or "eileanan siaror shetland islands" or bridgend or "neath port talbot" or cardiff or "vale and glamorgan" or "central valleys" or conwy or denbighshire or flintshire or wrexham or "gwent valleys" or gwynedd or "isle and anglesey" or monmouthshire or newport or powys or swansea or ceredigion or carmarthenshire or pembrokeshire or "merthyr tydfil" or "rhondda cynon taff" or "blaenau gwent" or caerphilly or torfaen or caithness or sutherland or cromarty or teeside or tyneside or wearside or "west mercia" or avon or ulster or derry or medway or "east riding" or "west riding" or "lake district" or "peak district" or cumberland or dartmoor or exmoor or sweden or sverige or swedish or svenska or stockholm* or norrland or svealand or mellansverige or smaland or sydsverige or vastsverige or orebro or ostergotland* or vastergotland* or skara* or bohus* or dalsland or narke or sodermanland or uppsala or uppland or vastmanland* | 783596  |

|                                                                                                                                                                                                                                                                                                                                                                                                                                                                                                                                                                                                                                                                                                                                                                                                                                                                                                                                                                                                                                                                                                                                                                                                                                                                                                                                                                                                                                                                                                                                                                                                                                                                                                                                                                                                                                                                                                                                                                                                                                                                                                                                                                                                                                                                                                                                                                                                                                                                                                                                                                                                                                                                                                                                                                                                                                                                                                                                                                                                                                                                                                                                                                                                                                                                                                                                                                                                                                                                                                                                                                                                                                                                                                                                                                                                                                                                                                                                                                                                                                                                                                                                                                                                                                                                                                                                                                           |        |
|---------------------------------------------------------------------------------------------------------------------------------------------------------------------------------------------------------------------------------------------------------------------------------------------------------------------------------------------------------------------------------------------------------------------------------------------------------------------------------------------------------------------------------------------------------------------------------------------------------------------------------------------------------------------------------------------------------------------------------------------------------------------------------------------------------------------------------------------------------------------------------------------------------------------------------------------------------------------------------------------------------------------------------------------------------------------------------------------------------------------------------------------------------------------------------------------------------------------------------------------------------------------------------------------------------------------------------------------------------------------------------------------------------------------------------------------------------------------------------------------------------------------------------------------------------------------------------------------------------------------------------------------------------------------------------------------------------------------------------------------------------------------------------------------------------------------------------------------------------------------------------------------------------------------------------------------------------------------------------------------------------------------------------------------------------------------------------------------------------------------------------------------------------------------------------------------------------------------------------------------------------------------------------------------------------------------------------------------------------------------------------------------------------------------------------------------------------------------------------------------------------------------------------------------------------------------------------------------------------------------------------------------------------------------------------------------------------------------------------------------------------------------------------------------------------------------------------------------------------------------------------------------------------------------------------------------------------------------------------------------------------------------------------------------------------------------------------------------------------------------------------------------------------------------------------------------------------------------------------------------------------------------------------------------------------------------------------------------------------------------------------------------------------------------------------------------------------------------------------------------------------------------------------------------------------------------------------------------------------------------------------------------------------------------------------------------------------------------------------------------------------------------------------------------------------------------------------------------------------------------------------------------------------------------------------------------------------------------------------------------------------------------------------------------------------------------------------------------------------------------------------------------------------------------------------------------------------------------------------------------------------------------------------------------------------------------------------------------------------------------------|--------|
| <p>or jamtland* or harjedalen or vasternorrland* or dalarna or kopparberg or gävleborg* or gästrikland or helsingland or varmland* or gotland* or oland or jonköping* or kalmar* or kronoberg* or blekinge or skåne* or norrbotten* or vasterbotten* or lappland or angermanland or medelpad or halland* or gotaland* or gothenburg or goteborg* or malmö* or vasteras or linköping or helsingborg or helsingborg or norrköping or gävle or umeå or luleå or karlstad or kalmar or huddinge or solna or östersjö* or malaren* or malardalen or spain or espana or spanish or espanol* or spaniard* or madrid or andalucia or andalusia).ab.ti.</p>                                                                                                                                                                                                                                                                                                                                                                                                                                                                                                                                                                                                                                                                                                                                                                                                                                                                                                                                                                                                                                                                                                                                                                                                                                                                                                                                                                                                                                                                                                                                                                                                                                                                                                                                                                                                                                                                                                                                                                                                                                                                                                                                                                                                                                                                                                                                                                                                                                                                                                                                                                                                                                                                                                                                                                                                                                                                                                                                                                                                                                                                                                                                                                                                                                                                                                                                                                                                                                                                                                                                                                                                                                                                                                                        |        |
| <p>36 (aragon or cantabria or canarias or "canary islands" or "castilla y leon" or "castile la mancha" or "castilla la mancha" or cataluna or catalonia or ceuta or melilla or navarra or navarre or valencia* or extremadura or galicia or balears or "balearic islands" or baleares or "la rioja" or "pais vasco" or "basque country" or coruna or alava or araba or albacete or alicante or alacant or almeria or asturias or avila or badajoz or badajos or barcelona or burgos or caceres or cadiz or castellon or castello or "ciudad real" or (cordoba not argent*) or cuenca or eivissa or ibiza or formentera or "el hierro" or fuerteventura or girona or gerona or "gran canaria" or granada or (guadalajara not mexic*) or guipuzcoa or gipuzkoa or huelva or huesca or jaen or gomera or palma or lanzarote or leon or lleida or lerida or lugo or malaga or mallorca or majorca or menorca or minorca or murcia or ourense or orense or palencia or pontevedra or salamanca or segovia or sevilla or seville or soria or tarragona or tenerife or teruel or toledo or valencia or valladolid or vizcaya or biscay or zamora or zaragoza or saragossa or bilbao or bilbo or compostela or "san sebastian" or donostia or vitoria or oviedo or pamplona or logrono or gasteiz or slovenia* or slovenija or ljubljana or gorenjska or carniola or goriska or gorizia or koroska or carinthia or "notranjsko kraska" or "obalno kraska" or "coastal karst" or podravska or pomurska or savinjska or spodnjeposavska or zasavska or osrednjeslovenska or maribor or celje or kranj or velenje or koper or capodistria or "novo mesto" or ptuj or trbovlje or kamnik or murska or sobota or "nova gorica" or slovakia or slovensk* or slovak* or bratislav* or nitrian* or nitra or trencian* or trencin or bankskobystri* or "banska bystrica" or zilina or zilin* or trnava or trnav* or presov* or kosic* or (martin and (city or svaty)) or poprad or italy or italia* or rome or roma or abruzzo or abruzzu or basilicata or lucania or calabria or campania or "emilia romagna" or "friuli venezia giulia" or lazio or latium or liguria* or lombardy or lombardia or marche or marches or molisano or molise or piedmont* or piemonte or sardinia or sardegna or sicily or sicilia or toscana or tuscanu or trentino or trento or umbria or veneto or triveneto or puglia or apulia or bolzano or bozen or milan or milano or naples or napoli or turin or torino or palermo or genoa or genova or florence or firenze or bari or catania or venezia or venice or padova or padua or siena or bologna or trieste or urbino or aosta or aoste or perugia or brescia or cagliari or catanzaro or aquila or ancona or ireland or ireland or eire or irish* or dublin or fíngal or "dun laoghaire" or wicklow or wexford or carlow or kildare or meath or louth or monaghan or cavan or longford or westmeath or offaly or laois or kilkenny or waterford or cork or kerry or limerick or tipperary or clare or galway or mayo or roscommon or sligo or leitrim or donegal or drogheda or dundalk or swords or bray or navan or leinster or connacht or hungar* or budapest or transdanubia or magyarország or magyar or dunantuli or dunantul or "great plain" or "alfold es eszak" or "eszak alfold" or "del alfold" or bacs or kiskun or "northern alfold" or "southern alfold" or baranya or bekes or borsod or abauj or zemplen or fõvaros or csongrad or fejer or moson or sopron or hajdu or bihar or heves or "jász nagykun szolnok" or komárom or esztergom or nograd or (Pest and (megye or county)) or somogy or szabolcs or szatmar or bereg or tolna or vas or veszprem or zala or zalaegerszeg or debrecen or miskolc or szeged or pecs or gyor or nyiregyhaza or kecskemet or szekesfehervar or szombathely or bekescsaba or eger or tatabanya or salgotarjan or kaposvar or szekszard or greece or "hellenic republic" or greek* or ellada or "elliniki dimokratia" or hellas or hellenes or attica or attiki or makedonia or macedonia or thraki or thrace or crete or kriti or epirus or ipeiros or "ionia nisia" or "ionian nesos" or "ionian islands" or "north aegean" or "aegean islands" or "nisoí agaiou" or "notio aigaiou" or peloponnese or peloponnisos or "voreio aigaiou" or "south aegean" or thessaly or thessalia).ab.ti.</p> | 356273 |
| <p>37 (cyclades or kyklades or dodecanese or dodekanisa or "mount athos" or "omicronros alphathos" or athens or athina or thessaloniki or thessalonica or patras or patra or heraklion or heraclion or iraklion or irakleion or iraklio or larissa or larisa or volos or rhodes or rodos or ioannina or janina or yannena or chania or chalcis or chalkida or alexandroupoli or german* or deutschland or deutsch* or bundesrepublik or westdeutschland or ostdeutschland or baden or wuerttemberg or wuerttemberg or bayern or bavaria or berlin or brandenburg or</p>                                                                                                                                                                                                                                                                                                                                                                                                                                                                                                                                                                                                                                                                                                                                                                                                                                                                                                                                                                                                                                                                                                                                                                                                                                                                                                                                                                                                                                                                                                                                                                                                                                                                                                                                                                                                                                                                                                                                                                                                                                                                                                                                                                                                                                                                                                                                                                                                                                                                                                                                                                                                                                                                                                                                                                                                                                                                                                                                                                                                                                                                                                                                                                                                                                                                                                                                                                                                                                                                                                                                                                                                                                                                                                                                                                                                   | 442143 |

|                                                                                                                                                                                                                                                                                                                                                                                                                                                                                                                                                                                                                                                                                                                                                                                                                                                                                                                                                                                                                                                                                                                                                                                                                                                                                                                                                                                                                                                                                                                                                                                                                                                                                                                                                                                                                                                                                                                                                                                                                                                                                                                                                                                                                                                                                                                                                                                                                                                                                                                                                                                                                                                                                                                                                                                                                                                                                                                                                                                                                                                                                                                                                                                                                                                                                                                                                                                                                                                                                                                                                                                                                                                                                                                                         |        |
|-----------------------------------------------------------------------------------------------------------------------------------------------------------------------------------------------------------------------------------------------------------------------------------------------------------------------------------------------------------------------------------------------------------------------------------------------------------------------------------------------------------------------------------------------------------------------------------------------------------------------------------------------------------------------------------------------------------------------------------------------------------------------------------------------------------------------------------------------------------------------------------------------------------------------------------------------------------------------------------------------------------------------------------------------------------------------------------------------------------------------------------------------------------------------------------------------------------------------------------------------------------------------------------------------------------------------------------------------------------------------------------------------------------------------------------------------------------------------------------------------------------------------------------------------------------------------------------------------------------------------------------------------------------------------------------------------------------------------------------------------------------------------------------------------------------------------------------------------------------------------------------------------------------------------------------------------------------------------------------------------------------------------------------------------------------------------------------------------------------------------------------------------------------------------------------------------------------------------------------------------------------------------------------------------------------------------------------------------------------------------------------------------------------------------------------------------------------------------------------------------------------------------------------------------------------------------------------------------------------------------------------------------------------------------------------------------------------------------------------------------------------------------------------------------------------------------------------------------------------------------------------------------------------------------------------------------------------------------------------------------------------------------------------------------------------------------------------------------------------------------------------------------------------------------------------------------------------------------------------------------------------------------------------------------------------------------------------------------------------------------------------------------------------------------------------------------------------------------------------------------------------------------------------------------------------------------------------------------------------------------------------------------------------------------------------------------------------------------------------------|--------|
| <p>bremen or hamburg or hessen or hesse or hessia or mecklenburg or vorpommern or pomerania or niedersachsen or neddersassen or saxony or niederbayern or "north rhine" or westphalia or westfalen or "rhineland palatinate" or "rheinland pfalz" or saarland or sachsen or "schleswig holstein" or thuringia or thuringen or thuringen or freiburg or karlsruhe or callsruhe or stuttgart or tubingen or oberbayern or "upper palatinate" or oberpfalz" or franken or franconia or oberfranken or mittelfranken or schwaben or unterfranken or swabia or darmstadt or giessen or kassel or arnsberg or cologne or koln or koeln or detmold or dusseldorf or duesseldorf or munster or muenster or munich or munchen or muenchen or frankfurt or dortmund or essen or nurnberg or nuernberg or nuremberg or hanover or hannover or leipzig or dresden or ruhrgebiet or revier or ruhrpott or pott or ruhr or france or french* or francais or alsace or aquitaine or auvergne or brittany or bretagne or bourgogne or burgundy or "champagne ardenne" or "franche comte" or "ile de france" or "languedoc roussillon" or limousin or lorraine or normandie or normandy or "midi pyrenees" or "nord pas de calais" or picardie or picardy or "poitou charentes" or provence or "rhone alpes" or corse or corsica or guiana or guyane or guadeloupe or martinique or reunion or mayotte or ain or aise or allier or "alpes de haute provence" or "haute alpes" or "alpes maritimes" or ardeche or ardennes or ariege or aube or aude or aveyron or "bas rhin" or "bouches du rhone" or calvados or cantal or charente or cher or correze or "corse du sud" or cote* or azur* or creuse or "deux sevres" or dordogne or doubs or drome or essonne or eure or finistere or gard or gers or gironde or "haute corse" or "haute garonne" or "haute marne" or "hautes alpes" or "haute saone" or "haute savoie" or "hautes pyrenees" or "haute vienne" or "haut rhin" or "hauts de seine" or herault or "ille et vilaine" or indre or isere or jura or landes or loire or loiret (lot and (departement or department)) or "lot et garonne" or "loir et cher" or lozere or manche or marne or mayenne or "meurthe et moselle" or meuse or morbihan or moselle or (nord and (department or departement)) or nievre or oise or orne or "pas de calais" or paris or "puy de dome" or "pyrenees atlantiques" or "pyrenees orientales" or rhone or sarthe or savoie or "seine et marne" or "seine maritime" or somme or tarn or "territoire de belfort" or "val de marne" or var or vaucluse or vendee or vienne or vosges or yonne or yvelines or marseille or lyon or nice or nantes or strasbourg or montpellier or bordeaux or lille or toulouse or finland or finnish* or suomi* or lapland or lappi or lapland or ostrobothnia or pohjanmaa or osterbotten or kainuu or kajanaland* or karelia or karjala or karelen or savonia or savo or savolax or pirkanmaa or birkaland or satakunta or satakunda or tavastia or tavastland or "pajjat hame" or "kanta hame" or uusimaa or nyland or kymenlaakso or kymmenedalen or aland or ahvenanmaa or helsinki or helsingfors or espoo or esbo or tampere or tammerfors or vantaa or vanda or oulu or uleaborg or turku or abo or jyvaskyla or kuopio or lathi or lahtis or kouvola or estonia* or eesti or esti or tallinn or harju or harjumaa or hiiu or hiiumaa or "ida viru" or "ida virumaa" or jarvamaa or jarva or jogevamaa or jogeva or laanemaa or laane or parnumaa or polva or polvamaa or rapla or raplamaa or saare or saaremaa or tartu or tartumaa or valga or valgamaa or valgamaakond or viljandimaa or voru or vorumaa or narva or parnu or kohtla jarve or viljandi).ab.ti.</p> |        |
| <p>38 (rakvere or maardu or sillamae or kuessaaere or romania* or rumania* or roumania* or romanian or roman or bucharest or bucuresti or alba or brasov or covasna or harghita or mures or sibiu or bacau or botosani or iasi or neamt or suceava or vaslui or bihor or "bistrita nasaud" or cluj or maramures or salaj or "satu mare" or arges or calarasi or dambovita or giurgiu or ialomita or prahova or teleorman or braila or buzau or galati or tulcea or vrancea or dolj or gorj or mehedinti or (olt and (river or county or region or judetul or raul)) or valcea or vilcea or arad or caras-severin or hunedoara or timis or ilfov or timisoara or constanta or craiova or ploiesti or oradea or cluj- napoca or deva or portugal or portugues* or lisboa or lisbon or leira or santarem or beja or faro or evora or portalegre or "castelo branco" or guarda or aveiro or viseu or braganca or "vila real" or "viana do castelo" or alentejo or azores or acores or madeira or "os montes" or (ave and (community or intermunicipal or comunidade)) or mondego or vouga or beira or cavado or lafoes or douro or porto or tejo or minho or setubal or pinhal or "serra da estrela" or tamega or algarve or gaia or amadora or braga or (agualva and cacem) or funchal or coimbra or almada or poland or polska or polish or polski or pole or poles or polak or polka or polacy or warsaw or warszawa or wielkopolskie or pomerania* or pomorskie or kuyavian or kujawsko or malopolskie or lodz or lodzkie or silesia* or dolnoslaskie or lublin or lubelskie or lubus or lubusz or lubuskie or masovia or mazowske or masovian or mazowieckie or opole or opolskie or podlaskie or podlachia or podlasie or subcarpathian* or carpathian* or podkarpackie or swietokrzyskie or slaskie or slask or "varmia mazuria" or</p>                                                                                                                                                                                                                                                                                                                                                                                                                                                                                                                                                                                                                                                                                                                                                                                                                                                                                                                                                                                                                                                                                                                                                                                                                                                                                                                                                                                                                                                                                                                                                                                                                                                                                                                                                                                                                                                                                              | 322610 |

|                                                                                                                                                                                                                                                                                                                                                                                                                                                                                                                                                                                                                                                                                                                                                                                                                                                                                                                                                                                                                                                                                                                                                                                                                                                                                                                                                                                                                                                                                                                                                                                                                                                                                                                                                                                                                                                                                                                                                                                                                                                                                                                                                                                                                                                                                                                                                                                                                                                                                                                                                                                                                                                                                                                                                                                                                                                                                                                                                                                                                                                                                                                                                                                                                                                    |        |
|----------------------------------------------------------------------------------------------------------------------------------------------------------------------------------------------------------------------------------------------------------------------------------------------------------------------------------------------------------------------------------------------------------------------------------------------------------------------------------------------------------------------------------------------------------------------------------------------------------------------------------------------------------------------------------------------------------------------------------------------------------------------------------------------------------------------------------------------------------------------------------------------------------------------------------------------------------------------------------------------------------------------------------------------------------------------------------------------------------------------------------------------------------------------------------------------------------------------------------------------------------------------------------------------------------------------------------------------------------------------------------------------------------------------------------------------------------------------------------------------------------------------------------------------------------------------------------------------------------------------------------------------------------------------------------------------------------------------------------------------------------------------------------------------------------------------------------------------------------------------------------------------------------------------------------------------------------------------------------------------------------------------------------------------------------------------------------------------------------------------------------------------------------------------------------------------------------------------------------------------------------------------------------------------------------------------------------------------------------------------------------------------------------------------------------------------------------------------------------------------------------------------------------------------------------------------------------------------------------------------------------------------------------------------------------------------------------------------------------------------------------------------------------------------------------------------------------------------------------------------------------------------------------------------------------------------------------------------------------------------------------------------------------------------------------------------------------------------------------------------------------------------------------------------------------------------------------------------------------------------------|--------|
| <p>"varmian mazurian" or "varmia masuria" or "varmian masurian" or "warmia mazury" or "warminsko mazurskie" or zachodniopomorskie or krakow or cracow or wroclaw or poznan or gdansk or szczecin or bydgoszcz or katowice or bialystok or olsztyn or kielce or "zielona gora" or torun or "gorzow wielkopolski" or netherlands or nederland* or dutch* or amsterdam or drenthe or flevoland or friesland or fryslan or gelderland or guelders or groningen or limburg or "north brabant" or "noord brabant" or holland or overijssel or overijssel or utrecht or zeeland or rotterdam or hague or eindhoven or tilburg or almere or breda or nijmegen or nimeguen or malta or maltese or valletta or gozo or ghawdex or luxembourg* or luxemburg or letzebuerg or diekirch or grevenmacher or lithuania* or "lietuvos respublika" or lietuva or lietuviu or vilnius or vilniaus or kaunas or kauno or klaipeda or klaipedos or panevezys or panevezio or siauliai or siauliu or alytus or alytaus or taurages or taurage or marijampoles or marijampole or telsiu or telsiai or utenos or utena or mazeikiai or jonava or mazeikiu or jonavos or latvi* or latvija* or riga or courland or kurzeme or kurland or latgale or lettgallia or latgola or vidzeme or vidumo or semigallia or semigalia or zemgale or pieriga or daugavpils or dinaburg or liepaja or libau or jelgava or jurmala or jekabpils or jakobstadt or rezekne or rezne or rositten or valmiera or wolmar or ventspils or windau or denmark or danish* or danmark or dansk* or hovedstaden or midtjylland or sjælland or sealand or syddanmark or jutland or jylland or nordjylland or sonderjyllands or "zealand region" or "region zeeland" or hillerod or viborg or aalborg or alborg or soro or vejle or copenhagen or kobenhavn or arhus or aarhus or roskilde or odense or frederiksberg or esbjerg or gentofte or gladsaxe or randers or kolding or czech* or cesk* or stredoces* or jihoce* or bohemia or bohemian or kralovehradec* or "hradec kralove" or karlovars* or "karlovy vary" or liberec* or moravskoslezs* or "moravian silesian" or olomouc* or pardubic* or pardubice or plzen* or pilsen or prage or praha or prag or jihomorav* or moravia or moravian or morava or usteck* or usti or vysocina or zlin or zlinsk* or "ceske budejovice" or budweis or brno or ostrava or cyprus or cypriot* or kypros or kibris or kypriaki* or nicosia or lefkosa).ab.ti.</p>                                                                                                                                                                                                                                                                                                                                                                                                                                                                                                                                                                                                                                                                                                                                                                                         |        |
| <p>39 (lefkosia or famagusta or magusa or ammochoostos or gazimagusa or kyrenia or girne or keryneia or larnaca or larnaka or limassol or lemesos or limasol or leymosun or paphos or pafos or baf or gazibaf or protaras or pergamos or beyarmudu or morfou or guzelyurt or omorfo or morphou or aradippou or croatia* or hrvatsk* or hrvati or bjelovar or "bjelovarsko bilogorska" or "brod posavina" or "brodsko posavska" or "dubrovnik neretva" or "dubrovačko neretvanska" or istria or istarska or karlovačka or karlovac or "koprivnicko krizevačka" or koprivnica or krizevci or "krapina zagorje" or "krapinsko zagorska" or "lika senj" or "licko senjska" or medimurska or medimurje or osijek or osječko or baranja or "osječko baranjska" or "pozeška slavonska" or "pozesko slavonska" or "primorje gorski kotar" or "primorsko goranska" or "sibensko kninska" or "sibensko kninske" or sibenik or knin or sisak or "sisacko moslavacka" or moslavina or "splitsko dalmatinska" or split or dalmatia or varazdin or varazdinska or viroviticko-podravska or virovitica or podravina or "vukovarsko srijemska" or vukovar or srijem or zadar or zadarska or zagreb or zagrebacka or rijeka or "velika gorica" or "slavonski brod" or pula or bulgaria* or sofia or gabrovo or blagevgrad or "pirin macedonia" or burgas or dobrich or haskovo or kardzhali or kurdzhali or kyustendil or lovech or montana or pazardzhik or pernik or pleven or plovdiv or razgrad or rousse or ruse or shumen or sliven or silistra or smolyan or "stara zagora" or targovishte or varna or tarnovo or vidin or vratsa or vratza or yambol or belgi* or belge or belgisch or brussel* or bruxelles or bruxelloise or flemish or flamand or flemisch or flanders or flandern or flandre or vlaanderen or vlaams or flamande or waals or walloon* or wallon* or antwerp* or anvers or ostflandern or "vlaams brabant" or limburg or limburg or hainault or hainaut or henegouwen or hennegau or liege or luik or luttich or namur or namen or westflandern or "waals brabant" or ghent or gent or gand or charleroi or bruges or brugge or schaerbeek or schaarbeek or anderlecht or leuven or louvain or hasselt or mons or wavre or waver or austria* or vienna or wien or osterreich* or sudosterreich or westosterreich or niederosterreich or burgenland or carinthia or karnten or oberosterreich or styria or steiermark or salzburg or saizburg or tyrol or tirol or becs or vorarlberg or bregenz or linz or eisenstadt or innsbruck or graz or klagenfurt or polten or villach or wels or dornbirn or feldkirch or steyr or iceland or icelandic* or islenska* or icelander* or islendinga* or islendigar or inslenska or reykjavik or reykjavikurborg or hofudborgarsvaedid or sudurnes or vesturland or vestfirðir or westfjords or nordurland or austurland or sudurland or kopavogur or hafnarfjörður or Akureyri or Gardabaer or Mosfellsbaer or Keflavik or Akranes or Selfoss or Seltjarnarnes or switzerland or schweiz or schweizerische or swiss or suisse or aargau or argovia or ausserrhoden or "outer rhodes" or innerrhoden or "inner rhodes" or basel or bern or berne or fribourg or freiburg or geneva or geneve or</p> | 378988 |

|                                                                                                                                                                                                                                                                                                                                                                                                                                                                                                                                                                                                                                                                                                                                                                                                                                                                                                                                                                                                                                                                                                                                                                                                                                                                                                                                                                                                                                                                                                                                                                                                                                                                                                                                                                                                                                                                                                                                                                                                                                                                                                                                                                                                                                                                                                                                                                                                                                                                                                                                                                                                                                                                                                                                              |       |
|----------------------------------------------------------------------------------------------------------------------------------------------------------------------------------------------------------------------------------------------------------------------------------------------------------------------------------------------------------------------------------------------------------------------------------------------------------------------------------------------------------------------------------------------------------------------------------------------------------------------------------------------------------------------------------------------------------------------------------------------------------------------------------------------------------------------------------------------------------------------------------------------------------------------------------------------------------------------------------------------------------------------------------------------------------------------------------------------------------------------------------------------------------------------------------------------------------------------------------------------------------------------------------------------------------------------------------------------------------------------------------------------------------------------------------------------------------------------------------------------------------------------------------------------------------------------------------------------------------------------------------------------------------------------------------------------------------------------------------------------------------------------------------------------------------------------------------------------------------------------------------------------------------------------------------------------------------------------------------------------------------------------------------------------------------------------------------------------------------------------------------------------------------------------------------------------------------------------------------------------------------------------------------------------------------------------------------------------------------------------------------------------------------------------------------------------------------------------------------------------------------------------------------------------------------------------------------------------------------------------------------------------------------------------------------------------------------------------------------------------|-------|
| <p>glarus or graubunden or grisons or grigioni or jura or lucerne or luzern or neuchatel or zurich (uri and (canton or kanton)) or schwyz or obwalden or nidwalden or zug or solothurn or schaffhausen or thurgau or thurgovia or ticino or tessin or vaud or valais or wallis or "st gallen" or lausanne or winterthur or winterthour or lugano or biel or bienne or norway or norwegian* or norge or noreg or norgga or ostfold or akershus or oslo or hedmark or oppland or buskerud or vestfold or telemark or "aust agder" or "vest agder" or rogaland or hordaland or "sogn og fjordane" or "sogn and fjordane" or "sogn fjordane" or "more og romsdal" or "more and romsdal" or "more romsdal" or trondelag or nordland or troms or finnmark or bergen or stavanger or sandnes or trondheim or kristiansand or drammen or fredrikstad or sarpsborg or porsgrunn or skien or tonsberg or alesund or liechtenstein or vaduz or triesenberg or triesen or schellenberg or schaan or ruggell or planken or mauren or gamprin or eschen or balzers or turkey or turkiye or turkish or istanbul or marmara or aegean or anatolia or "black sea" or tekirdag or balikesir or izmir or aydin or manisa or bursa or kocaali or ankara or konya or antalya or adana or hatay or kirikkale or kayseri or zonguldak or kastamonu or samsun or trabzon or erzurum or agri or malatya or (van and (region or subregion or bolgesi)) or gaziantep or sanliurfa or mardin or mersin).ti,ab.</p>                                                                                                                                                                                                                                                                                                                                                                                                                                                                                                                                                                                                                                                                                                                                                                                                                                                                                                                                                                                                                                                                                                                                                                                                                                                       |       |
| <p>40 ("Esch sur Alzette" or "Esch Uelzecht" or "Esch an der Alzette" or "Esch an der Alzig" or Dudelage or Diddeleng or Dudelingen or Duedelingen or Schifflange or Scheffleng or Schifflingen or Bettembourg or Beetebuerg or Bettemburg or Petange or Peiteng or Petingen or Ettelbruck or Ettelbreck or Ettelbrueck or Dikrech or Strassen or Stroossen or Bertrange or Bartreng or Bartringen or Latgalia or Ogre or "Valle d Aosta" or "Vallee d Aoste Venetia" or "Aosta Valley" or "Vallee d'Aoste" or "Valle d'Aosta" or "na Iarmhi" or "an Longfoirt" or Muineachan or "Contae Lu" or "Cill Dara" or "Chill Dara" or "Ath Cliath" or "Chill Mhantain" or "Loch Garman" or "Fine Gall" or "Cill Mhantain" or Ceatharlach or "An Mhi" or Mhuineachain or "An Uaimh" or "Dun Dealgan" or "Droichead Atha" or Mumhain or Dunnya or Dinnygal or "Cuige Laighean" or Connachta or Sord or "Cuige Mumhan" or Laighin or Liatroma or Liatroim or "Dhun na nGall" or Sligeach or Shligigh or "Mhaigh Eo" or "Maigh Eoor Ros comain" or Gaillimh or "na Gaillimhe" or "An Clar" or "an Chlair" or "Thiobraid Arann" or Luimneach or Luimnigh or "Chill Chainnigh" or "Cill Chainnigh" or Corcaigh or Ciarrai or Chiarrai or "Tiobraid Arann" or Watterford or "Port Lairge" or "An Longfort" or "Contae na Mi" or "An Cabhan" or "An Cabhain" or "Laoise " or "Uibh Fhaili" or "Ionian island" or "Northern Aegean" or Petthalia or "Southern Aegean" or Cyclades or Piraeus or Pireas or "Aegean island" or "Voreio Aigaiou" or "Oros Athos" or "Perifereia Ipeirou" or "North Alfold" or "South Alfold" or "Stara Zagora" or Bulgariya or Balgarija or Rusenka or Sofyiska or "Veliko Tarnovoor" or Suomalaiset or Suomen or "Laane Virumaa" or Eestlased or Eestlane or Finn or Finns or Frederiksberg or Storstrom or Bornholm or Ringkjober or Frederiksborg or danes or dane or Holomoc or Cestina or Cech or Engomi or Prague or Eglence or Aglandjia or Aglantzia or "Kato Polemidia" or "Kato Polemidhia" or Aradhippou or Iskele or Strovolos or Lakatamia or Lakadamyia or Kyprioi or Goettingen or Bonn or Gottingen or Mitteldeutschland or Rhein or Rhine or Braunschweig or Oldenburg or "Northern Rhine" or "Seine Saint Denis" or "Outre Mer" or Oise or "Noord-Nauw van Kales" or "Rono Arpes" or "Rose Aups" or "Peitau Charantas" or "Poitou-Cherentes" or "Mieidia Pireneus" or "Broiou al Liger" or "Pays de la Loire" or "Mediodia Pirineos" or Lothringen or "Miegjorn Pireneus" or Lottringe or Lemosin or "Frantche Comte" or Normandie or Aguiene or Auvernhe or Elsass or Auvernha or Aquitania or Bregogne or Akitania or "Lengadoc Rosselhon" or "Lenguadoc-Rossello" or "Franche Comtat" or Lahti).ti,ab.</p> | 17150 |
| <p>41 (Lunnonderrie or Dyfed or Merionethshire or Anthrim or Radnorshire or Montgomeryshire or Aontroim or "Contae Aontroma" or Entrim or "Ard Mhacha" or Airmagh or "An Dun" or "an Duin" or Doon or Doun or "Fear Manach" or "Fhear Manach" or Fermanay or Doire or Dhoire or Banffshire or Berwickshire or Cromartyshire or Dumfriesshire or Haddingtonshire or Kincardineshire or Inverness or Dumbarton or Kirkcudbrightshire or Nairnshire or Peeblesshire or Perthshire or Elginshire or Ross* or Roxburghshire or Selkirkshire or Linlithgowshire or Stirlingshire or Zetland or Wigtownshire or Brecknockshire or Caernarfonshire or Clwyd or Cardiganshire or Great Britain or GB or Scots or Cymru or "Isle of Ely" or Cleveland or Cornwall or Hereford or Huntingdon or Humberside or Huntingdonshire or Worcester or Middlesex or Salop or Westmorland or "Isle of Man" or Jersey or Guernsey or "Channel Islands" or Forfarshire or Swedes or Swede or Sodermanlands or "Balear Islands" or Arago or Euskadi or "Baske region" or Galiza or "Las Palmas" or Slovenci or Slovene or Jugovzhodna or Drava or Savinja or Mura or "Central Sava" or Posavska or "Lower Sava" or Laibach or Lubiana</p>                                                                                                                                                                                                                                                                                                                                                                                                                                                                                                                                                                                                                                                                                                                                                                                                                                                                                                                                                                                                                                                                                                                                                                                                                                                                                                                                                                                                                                                                                                                            | 59028 |

| or Creina or Carnium or "Marburg an der Drau" or Chreina or Krainbur or Kopar or Wollan or Woellan or Neustadtl or Slovaci or Slovenki or Posonium or Besztercebanya or Neutra or Nyitra or Nyitria or Kaschau or Kassa or Presporok or Pressburg or Neusohl or Nagyszombat or Tyrnau or Trentschin or Trencsen or Zvolen or Deutschendorf or Turocszentmarton or Sillein or Tyrnavia or Varat or Temesva or Timisvar or Varad or Jassy or Lassy Galatz or Galac or Tomis or Konstantia or Kostence or Klausenburg or Kolozsvar or Kronstadt or Brasso or Brassovia or Coron or Rumani or Romani or "Alto Tras-os-Montes" or Oporto or Cimbra or Maltin or "s-Gravenhage" or "Den Haag" or Frisia or "Ill Belt" or Birkirkara or "B Kara" or Birchircara or Mosta or Qormi or "St Paul s Bay" or "St Paul's Bay" or "Pawl il Bahar" or Zabbar or Sliema or Naxxar or Gwann or "St John" or Zebbug or "Citta rohan" or Fgura).ab,ti. |         |
|-------------------------------------------------------------------------------------------------------------------------------------------------------------------------------------------------------------------------------------------------------------------------------------------------------------------------------------------------------------------------------------------------------------------------------------------------------------------------------------------------------------------------------------------------------------------------------------------------------------------------------------------------------------------------------------------------------------------------------------------------------------------------------------------------------------------------------------------------------------------------------------------------------------------------------------|---------|
| 42 or/32-41                                                                                                                                                                                                                                                                                                                                                                                                                                                                                                                                                                                                                                                                                                                                                                                                                                                                                                                         | 3026218 |
| 43 15 and 22 and 27 and 31 and 42                                                                                                                                                                                                                                                                                                                                                                                                                                                                                                                                                                                                                                                                                                                                                                                                                                                                                                   | 385     |
| 44 limit 43 to yr="2020-Current"                                                                                                                                                                                                                                                                                                                                                                                                                                                                                                                                                                                                                                                                                                                                                                                                                                                                                                    | 378     |
| 45 15 and 22 and 27 and 31                                                                                                                                                                                                                                                                                                                                                                                                                                                                                                                                                                                                                                                                                                                                                                                                                                                                                                          | 1260    |
| 46 limit 45 to yr="2020-Current"                                                                                                                                                                                                                                                                                                                                                                                                                                                                                                                                                                                                                                                                                                                                                                                                                                                                                                    | 1180    |
| Database: Embase <1974 to 2022 January 19>                                                                                                                                                                                                                                                                                                                                                                                                                                                                                                                                                                                                                                                                                                                                                                                                                                                                                          |         |
| KEY TERMS                                                                                                                                                                                                                                                                                                                                                                                                                                                                                                                                                                                                                                                                                                                                                                                                                                                                                                                           | HITS    |
| 1 exp Coronavirus/                                                                                                                                                                                                                                                                                                                                                                                                                                                                                                                                                                                                                                                                                                                                                                                                                                                                                                                  | 8442    |
| 2 Coronaviridae Infections/ or Coronaviridae/ or SARS-CoV-2/ or COVID-19/                                                                                                                                                                                                                                                                                                                                                                                                                                                                                                                                                                                                                                                                                                                                                                                                                                                           | 75117   |
| 3 Betacoronavirus 1/ or Betacoronavirus/                                                                                                                                                                                                                                                                                                                                                                                                                                                                                                                                                                                                                                                                                                                                                                                                                                                                                            | 7527    |
| 4 Coronavirus Infections/                                                                                                                                                                                                                                                                                                                                                                                                                                                                                                                                                                                                                                                                                                                                                                                                                                                                                                           | 11415   |
| 5 SARS Virus/                                                                                                                                                                                                                                                                                                                                                                                                                                                                                                                                                                                                                                                                                                                                                                                                                                                                                                                       | 7261    |
| 6 Severe Acute Respiratory Syndrome/                                                                                                                                                                                                                                                                                                                                                                                                                                                                                                                                                                                                                                                                                                                                                                                                                                                                                                | 10368   |
| 7 ((severe adj acute adj respiratory adj syndrome) or SARs or Sars-cov or ((sars-associated or sars-related) adj (cov or coronavirus))).mp.                                                                                                                                                                                                                                                                                                                                                                                                                                                                                                                                                                                                                                                                                                                                                                                         | 111209  |
| 8 SARS-CoV-2/                                                                                                                                                                                                                                                                                                                                                                                                                                                                                                                                                                                                                                                                                                                                                                                                                                                                                                                       | 21330   |
| 9 exp Coronavirus/ or exp Coronavirus Infections/                                                                                                                                                                                                                                                                                                                                                                                                                                                                                                                                                                                                                                                                                                                                                                                                                                                                                   | 220062  |
| 10 (Coronavir* or nCov or covid or covid-19).ti,ab,kf.                                                                                                                                                                                                                                                                                                                                                                                                                                                                                                                                                                                                                                                                                                                                                                                                                                                                              | 221653  |
| 11 Coronavirus OC43, Human/                                                                                                                                                                                                                                                                                                                                                                                                                                                                                                                                                                                                                                                                                                                                                                                                                                                                                                         | 590     |
| 12 HKU1.mp.                                                                                                                                                                                                                                                                                                                                                                                                                                                                                                                                                                                                                                                                                                                                                                                                                                                                                                                         | 713     |
| 13 HCV-OC43.mp.                                                                                                                                                                                                                                                                                                                                                                                                                                                                                                                                                                                                                                                                                                                                                                                                                                                                                                                     | 34      |
| 14 (("2019" adj (novel or new) adj corona*) or ("2019" adj (CoV or nCoV)) or (coronavirus adj (disease adj "2019") or COVID19 or COVID-19 or ((Novel or New) adj Corona*) or SARS2 or SARS-CoV-2 or (SARS adj2 (coronaviridae or coronavirus)) or ((sars or Coronavirus) adj "2") or nCov or 2019ncov).mp.                                                                                                                                                                                                                                                                                                                                                                                                                                                                                                                                                                                                                          | 238025  |
| 15 or/1-14                                                                                                                                                                                                                                                                                                                                                                                                                                                                                                                                                                                                                                                                                                                                                                                                                                                                                                                          | 264506  |
| 16 (attack rate* or (secondary adj2 attack rate*) or (contact adj2 attack rate*)).mp.                                                                                                                                                                                                                                                                                                                                                                                                                                                                                                                                                                                                                                                                                                                                                                                                                                               | 5647    |
| 17 Contact Tracing/ or contact*.mp. or (contact* adj1 transmission*).mp.                                                                                                                                                                                                                                                                                                                                                                                                                                                                                                                                                                                                                                                                                                                                                                                                                                                            | 558932  |
| 18 (cluster* or close*adj1 contact*).mp.                                                                                                                                                                                                                                                                                                                                                                                                                                                                                                                                                                                                                                                                                                                                                                                                                                                                                            | 520203  |
| 19 (second* adj transmission*).mp.                                                                                                                                                                                                                                                                                                                                                                                                                                                                                                                                                                                                                                                                                                                                                                                                                                                                                                  | 712     |
| 20 (contact adj transmission).mp.                                                                                                                                                                                                                                                                                                                                                                                                                                                                                                                                                                                                                                                                                                                                                                                                                                                                                                   | 569     |
| 21 ((transmit* adj1 rate*) or (transmiss* adj1 rate*)).mp.                                                                                                                                                                                                                                                                                                                                                                                                                                                                                                                                                                                                                                                                                                                                                                                                                                                                          | 6246    |
| 22 or/16-21                                                                                                                                                                                                                                                                                                                                                                                                                                                                                                                                                                                                                                                                                                                                                                                                                                                                                                                         | 1075687 |
| 23 family.mp.                                                                                                                                                                                                                                                                                                                                                                                                                                                                                                                                                                                                                                                                                                                                                                                                                                                                                                                       | 1278196 |
| 24 relatives.mp.                                                                                                                                                                                                                                                                                                                                                                                                                                                                                                                                                                                                                                                                                                                                                                                                                                                                                                                    | 82841   |
| 25 house*.mp.                                                                                                                                                                                                                                                                                                                                                                                                                                                                                                                                                                                                                                                                                                                                                                                                                                                                                                                       | 286819  |
| 26 home.mp.                                                                                                                                                                                                                                                                                                                                                                                                                                                                                                                                                                                                                                                                                                                                                                                                                                                                                                                         | 427356  |
| 27 or/23-26                                                                                                                                                                                                                                                                                                                                                                                                                                                                                                                                                                                                                                                                                                                                                                                                                                                                                                                         | 1936966 |
| 28 young*.mp.                                                                                                                                                                                                                                                                                                                                                                                                                                                                                                                                                                                                                                                                                                                                                                                                                                                                                                                       | 1363140 |
| 29 (toddler* or preschool* or child* or pediat* or paediat* or kid or kids or prepubescen* or prepuberty* or                                                                                                                                                                                                                                                                                                                                                                                                                                                                                                                                                                                                                                                                                                                                                                                                                        | 4728511 |



|                                                                                                                                                                                                                                                                                                                                                                                                                                                                                                                                                                                                                                                                                                                                                                                                                                                                                                                                                                                                                                                                                                                                                                                                                                                                                                                                                                                                                                                                                                                                                                                                                                                                                                                                                                                                                                                                                                                                                                                                                                                                                                                                                                                                                                                                                                                                                                                                             |         |
|-------------------------------------------------------------------------------------------------------------------------------------------------------------------------------------------------------------------------------------------------------------------------------------------------------------------------------------------------------------------------------------------------------------------------------------------------------------------------------------------------------------------------------------------------------------------------------------------------------------------------------------------------------------------------------------------------------------------------------------------------------------------------------------------------------------------------------------------------------------------------------------------------------------------------------------------------------------------------------------------------------------------------------------------------------------------------------------------------------------------------------------------------------------------------------------------------------------------------------------------------------------------------------------------------------------------------------------------------------------------------------------------------------------------------------------------------------------------------------------------------------------------------------------------------------------------------------------------------------------------------------------------------------------------------------------------------------------------------------------------------------------------------------------------------------------------------------------------------------------------------------------------------------------------------------------------------------------------------------------------------------------------------------------------------------------------------------------------------------------------------------------------------------------------------------------------------------------------------------------------------------------------------------------------------------------------------------------------------------------------------------------------------------------|---------|
| puberty or pubescen* or teen* or young* or youth* or minors* or under ag* or underag* or juvenile* or girl* or boy* or preadolesc* or adolesc* or nursery or prekindergarten or kindergarten* or early childhood education or preschool* or elementary education or elementary school* or primary education or primary school* or K-12* or K12 or 1st-grade* or first-grade* or grade 1 or grade one or 2nd-grade* or second-grade* or grade 2 or grade two or 3rd-grade* or third-grade* or grade 3 or grade three or 4th-grade* or fourth-grade* or grade 4 or grade four or 5th-grade* or fifth-grade* or grade 5 or grade five or 6th-grade* or sixth-grade* or grade 6 or grade six or intermediate general or middle school* or secondary education or secondary school*OR 7th-grade* or seventh-grade* or grade 7 or grade seven or 8th-grade* or eight-grade* or grade 8 or grade eight or 9th-grade* or ninth-grade* or grade 9 or grade nine or 10th-grade* or tenth-grade* or grade 10 or grade ten or 11th-grade* or eleventh-grade* or grade 11 or grade eleven or 12th-grade* or twelfth-grade* or grade 12 or grade twelve or junior high* or highschool* or high school* or preuniversity or pre-university or college* or tertiary education or tertiary school*OR postsecondary education or postsecondary school* or prevocational or vocational or classroom* or curricul* or education* or learner* or lesson* or pupil* or school* or student*).ti,ab,kf.                                                                                                                                                                                                                                                                                                                                                                                                                                                                                                                                                                                                                                                                                                                                                                                                                                                                                                                             |         |
| 30 toddlers/ or preschool children/ or young children/ or children/ or pediatrics/ or preadolescents/ or youth/ or adolescents/ or early adolescents/ or late adolescents/ or nursery schools/ or kindergarten/ or early childhood education/ or preschool education/ or preschool teachers/ or elementary secondary education/ or grade 1/ or grade 2/ or grade 3/ or grade 4/ or grade 5/ or grade 6/ or grade 7/ or grade 8/ or grade 9/ or grade 10/ or grade 11/ or grade 12/ or elementary education/ or elementary schools/ or elementary school students/ or elementary school teachers/ or primary education/ or public schools/ or public school teachers/ or middle schools/ or middle school students/ or junior high schools/ or junior high school students/ or secondary education/ or secondary schools/ or secondary school students/ or secondary school teachers/ or high schools/ or high school students/ or college students/ or colleges/ or two year college students/ or two year college students/ or vocational education/ or vocational schools/ or students/                                                                                                                                                                                                                                                                                                                                                                                                                                                                                                                                                                                                                                                                                                                                                                                                                                                                                                                                                                                                                                                                                                                                                                                                                                                                                                                   | 2060905 |
| 31 or/28-29                                                                                                                                                                                                                                                                                                                                                                                                                                                                                                                                                                                                                                                                                                                                                                                                                                                                                                                                                                                                                                                                                                                                                                                                                                                                                                                                                                                                                                                                                                                                                                                                                                                                                                                                                                                                                                                                                                                                                                                                                                                                                                                                                                                                                                                                                                                                                                                                 | 5012613 |
| 32 exp Europe/                                                                                                                                                                                                                                                                                                                                                                                                                                                                                                                                                                                                                                                                                                                                                                                                                                                                                                                                                                                                                                                                                                                                                                                                                                                                                                                                                                                                                                                                                                                                                                                                                                                                                                                                                                                                                                                                                                                                                                                                                                                                                                                                                                                                                                                                                                                                                                                              | 1673844 |
| 33 European Union/                                                                                                                                                                                                                                                                                                                                                                                                                                                                                                                                                                                                                                                                                                                                                                                                                                                                                                                                                                                                                                                                                                                                                                                                                                                                                                                                                                                                                                                                                                                                                                                                                                                                                                                                                                                                                                                                                                                                                                                                                                                                                                                                                                                                                                                                                                                                                                                          | 29014   |
| 34 (europa or europe* or EU or EEA or Euratom or Eurozone or EEC or ECSC or Euroregion or (Schengen and (area or countr* or region* or state*))).ti,ab.                                                                                                                                                                                                                                                                                                                                                                                                                                                                                                                                                                                                                                                                                                                                                                                                                                                                                                                                                                                                                                                                                                                                                                                                                                                                                                                                                                                                                                                                                                                                                                                                                                                                                                                                                                                                                                                                                                                                                                                                                                                                                                                                                                                                                                                     | 576357  |
| 35 (balkan* or baltic* or (mediterranean and (area or countr* or region* or state*)) or (alpine and (area* or countr* or region* or state*)) or nordic* or scandinavia* or danubian or "iberian peninsula" or "peninsula iberi*" or iberica or "iberiar peninsula" or yugoslavia or jugoslavija or jugoslavija or jugoslavia or Ceskoslovensko or "Cesko slovensko" or benelux or fennoscandia or fennoskandi or visegrad* or "grupa wyszehradzka" or "vysehradska skupina" or "vysehradska stvorkaor" or "united kingdom" or uk or britain or british or (england not new england) or english or scotland or scottish or wales or welsh or "northern ireland" or london or "east midlands" or "west midlands" or yorkshire or "east anglia" or bedfordshire or hertfordshire or essex or peterborough or cambridgeshire or norfolk or suffolk or luton or bedford or "southend on sea" or thurrock or derbyshire or nottinghamshire or leicestershire or rutland or lincolnshire or derby or leicester or northamptonshire or nottingham or "tyne and wear" or "tees valley" or durham or darlington or hartlepool or "stockton on tees" or northumberland or teesside or sunderland or cumbria or cheshire or manchester or lancashire or merseyside or blackburn or darwen or blackpool or chester or liverpool or sefton or warrington or wirral or berkshire or buckinghamshire or oxfordshire or hampshire or "isle of wight" or kent or surrey or sussex or brighton or hove or "milton keynes" or portsmouth or southampton or devon or dorset or somerset or gloucestershire or wiltshire or bath or bournemouth or poole or bristol or plymouth or swindon or torbay or herefordshire or staffordshire or birmingham or coventry or dudley or sandwell or shropshire or solihull or "stoke on trent" or telford or wrekin or walsall or warwickshire or wolverhampton or worcestershire or barnsley or doncaster or rotherham or bradford or calderdale or kirklees or kingston or leeds or sheffield or wakefield or (york not new york) or antrim or ards or armagh or ballymena or ballymoney or banbridge or carrickfergus or castlereagh or coleraine or cookstown or craigavon or (down and (district or council)) or dungannon or fermanagh or larne or limavady or lisburn or magherafelt or moyle or "newry and mourne" or Newtownabbey or omagh or strabane or Londonderry or tyrone or | 1156630 |



|                                                                                                                                                                                                                                                                                                                                                                                                                                                                                                                                                                                                                                                                                                                                                                                                                                                                                                                                                                                                                                                                                                                                                                                                                                                                                                                                                                                                                                                                                                                                                                                                                                                                                                                                                                                                                                                                                                                                                                                                                                                                                                                                                                                                                                                                                                                                                                                                                                                                                                                                                                                                                                                                                                                                                                                                                                                                                                                                                                                                                                                                                                                                                                                                                                                                                                                                                                                                                                                                                                                                                                                                                                                                                                                                                    |        |
|----------------------------------------------------------------------------------------------------------------------------------------------------------------------------------------------------------------------------------------------------------------------------------------------------------------------------------------------------------------------------------------------------------------------------------------------------------------------------------------------------------------------------------------------------------------------------------------------------------------------------------------------------------------------------------------------------------------------------------------------------------------------------------------------------------------------------------------------------------------------------------------------------------------------------------------------------------------------------------------------------------------------------------------------------------------------------------------------------------------------------------------------------------------------------------------------------------------------------------------------------------------------------------------------------------------------------------------------------------------------------------------------------------------------------------------------------------------------------------------------------------------------------------------------------------------------------------------------------------------------------------------------------------------------------------------------------------------------------------------------------------------------------------------------------------------------------------------------------------------------------------------------------------------------------------------------------------------------------------------------------------------------------------------------------------------------------------------------------------------------------------------------------------------------------------------------------------------------------------------------------------------------------------------------------------------------------------------------------------------------------------------------------------------------------------------------------------------------------------------------------------------------------------------------------------------------------------------------------------------------------------------------------------------------------------------------------------------------------------------------------------------------------------------------------------------------------------------------------------------------------------------------------------------------------------------------------------------------------------------------------------------------------------------------------------------------------------------------------------------------------------------------------------------------------------------------------------------------------------------------------------------------------------------------------------------------------------------------------------------------------------------------------------------------------------------------------------------------------------------------------------------------------------------------------------------------------------------------------------------------------------------------------------------------------------------------------------------------------------------------------|--------|
| <p>belfast or aberdeen or aberdeenshire or angus or dundee or argyll or bute or clackmannanshire or fife or ayrshire or dunbartonshire or lothian or renfrewshire or edinburgh or falkirk or glasgow or highland* or inverclyde or midlothian or moray or lanarkshire or kinross* or stirling or "orkney islands" or "eileanan siaror shetland islands" or bridgend or "neath port talbot" or cardiff or "vale and glamorgan" or "central valleys" or conwy or denbighshire or flintshire or wrexham or "gwent valleys" or gwynedd or "isle and anglesey" or monmouthshire or newport or powys or swansea or ceredigion or carmarthenshire or pembrokeshire or "merthyr tydfil" or "rhondda cynon taff" or "blaenau gwent" or caerphilly or torfaen or caithness or sutherland or cromarty or teeside or tyneside or wearside or "west mercia" or avon or ulster or derry or medway or "east riding" or "west riding" or "lake district" or "peak district" or cumberland or dartmoor or exmoor or sweden or sverige or swedish or svenska or stockholm* or norrland or svealand or mellansverige or smaland or sydsverige or vastsverige or orebro or ostergotland* or vastergotland* or skara* or bohus* or dalsland or narke or sodermanland or uppsala or uppland or vastmanland* or jamtland* or harjedalen or vasternorrland* or dalarna or kopparberg or gävleborg* or gästrikland or helsingland or varmland* or gotland* or oland or jonköping* or kalmar* or kronoberg* or blekinge or skane* or norrbotten* or vasterbotten* or lappland or angermanland or medelpad or halland* or gotaland* or gothenburg or goteborg* or malmo* or vasteras or linköping or helsingborg or helsingborg or norrköping or gävle or umea or lulea or karlstad or kalmar or huddinge or solna or ostersjö* or malaren* or malardalen or spain or espana or spanish or espanol* or spaniard* or madrid or andalucia or andalusia).ab.ti.</p>                                                                                                                                                                                                                                                                                                                                                                                                                                                                                                                                                                                                                                                                                                                                                                                                                                                                                                                                                                                                                                                                                                                                                                                                                                                                                                                                                                                                                                                                                                                                                                                                                                                                                                                                                                                                              |        |
| <p>36 (aragon or cantabria or canarias or "canary islands" or "castilla y leon" or "castile la mancha" or "castilla la mancha" or cataluna or catalonia or ceuta or melilla or navarra or navarre or valencia* or extremadura or galicia or balears or "balearic islands" or baleares or "la rioja" or "pais vasco" or "basque country" or coruna or alava or araba or albacete or alicante or alacant or almeria or asturias or avila or badajoz or badajos or barcelona or burgos or caceres or cadiz or castellon or castello or "ciudad real" or (cordoba not argent*) or cuenca or eivissa or ibiza or formentera or "el hierro" or fuerteventura or girona or gerona or "gran canaria" or granada or (guadalajara not mexic*) or guipuzcoa or gipuzkoa or huelva or huesca or jaen or gomera or palma or lanzarote or leon or lleida or lerida or lugo or malaga or mallorca or majorca or menorca or minorca or murcia or ourense or orense or palencia or pontevedra or salamanca or segovia or sevilla or seville or soria or tarragona or tenerife or teruel or toledo or valencia or valladolid or vizcaya or biscay or zamora or zaragoza or saragossa or bilbao or bilbo or compostela or "san sebastian" or donostia or vitoria or oviedo or pamplona or logrono or gasteiz or slovenia* or slovenija or ljubljana or gorenjska or carniola or goriska or gorizia or koroska or carinthia or "notranjsko kraska" or "obalno kraska" or "coastal karst" or podravska or pomurska or savinjska or spodnjeposavska or zasavska or osrednjeslovenska or maribor or celje or kranj or velenje or koper or capodistria or "novo mesto" or ptuj or trbovlje or kamnik or murska or sobota or "nova gorica" or slovakia or slovensk* or slovak* or bratislav* or nitrian* or nitra or trencian* or trencin or banskobystri* or "banska bystrica" or zilina or zilin* or trnava or trnav* or presov* or kosic* or (martin and (city or svaty)) or poprad or italy or italia* or rome or roma or abruzzo or abruzzu or basilicata or lucania or calabria or campania or "emilia romagna" or "friuli venezia giulia" or lazio or latium or liguria* or lombardy or lombardia or marche or marches or molisano or molise or piedmont* or piemonte or sardinia or sardegna or sicily or sicilia or toscana or tuscan or trentino or trento or umbria or veneto or triveneto or puglia or apulia or bolzano or bozen or milan or milano or naples or napoli or turin or torino or palermo or genoa or genova or florence or firenze or bari or catania or venezia or venice or padova or padua or siena or bologna or trieste or urbino or aosta or aoste or perugia or brescia or cagliari or catanzaro or aquila or ancona or ireland or ireland or eire or irish* or dublin or fingal or "dun laoghaire" or wicklow or wexford or carlow or kildare or meath or louth or monaghan or cavan or longford or westmeath or offaly or laois or kilkenny or waterford or cork or kerry or limerick or tipperary or clare or galway or mayo or roscommon or sligo or leitrim or donegal or drogheda or dundalk or swords or bray or navan or leinster or connacht or hungar* or budapest or transdanubia or magyarország or magyar or dunantuli or dunantul or "great plain" or "alfold es eszak" or "eszak alfold" or "del alfold" or bacs or kiskun or "northern alfold" or "southern alfold" or baranya or bekes or borsod or abauj or zemplen or foharos or csongrad or fejer or moson or sopron or hajdu or bihar or heves or "jasz nagykun szolnok" or komarom or esztergom or nograd or (Pest and (megye or county)) or somogy or szabolcs or szatmar or bereg or tolna or vas or vesprem or zala or zalaegerszeg or debrecen or miskolc or</p> | 660919 |

|                                                                                                                                                                                                                                                                                                                                                                                                                                                                                                                                                                                                                                                                                                                                                                                                                                                                                                                                                                                                                                                                                                                                                                                                                                                                                                                                                                                                                                                                                                                                                                                                                                                                                                                                                                                                                                                                                                                                                                                                                                                                                                                                                                                                                                                                                                                                                                                                                                                                                                                                                                                                                                                                                                                                                                                                                                                                                                                                                                                                                                                                                                                                                                                                                                                                                                                                                                                                                                                                                                                                                                                                                                                                                                                                                                                                                                                                                                                                                                                                                                                                                                                                                                                                                                                                                                      |        |
|------------------------------------------------------------------------------------------------------------------------------------------------------------------------------------------------------------------------------------------------------------------------------------------------------------------------------------------------------------------------------------------------------------------------------------------------------------------------------------------------------------------------------------------------------------------------------------------------------------------------------------------------------------------------------------------------------------------------------------------------------------------------------------------------------------------------------------------------------------------------------------------------------------------------------------------------------------------------------------------------------------------------------------------------------------------------------------------------------------------------------------------------------------------------------------------------------------------------------------------------------------------------------------------------------------------------------------------------------------------------------------------------------------------------------------------------------------------------------------------------------------------------------------------------------------------------------------------------------------------------------------------------------------------------------------------------------------------------------------------------------------------------------------------------------------------------------------------------------------------------------------------------------------------------------------------------------------------------------------------------------------------------------------------------------------------------------------------------------------------------------------------------------------------------------------------------------------------------------------------------------------------------------------------------------------------------------------------------------------------------------------------------------------------------------------------------------------------------------------------------------------------------------------------------------------------------------------------------------------------------------------------------------------------------------------------------------------------------------------------------------------------------------------------------------------------------------------------------------------------------------------------------------------------------------------------------------------------------------------------------------------------------------------------------------------------------------------------------------------------------------------------------------------------------------------------------------------------------------------------------------------------------------------------------------------------------------------------------------------------------------------------------------------------------------------------------------------------------------------------------------------------------------------------------------------------------------------------------------------------------------------------------------------------------------------------------------------------------------------------------------------------------------------------------------------------------------------------------------------------------------------------------------------------------------------------------------------------------------------------------------------------------------------------------------------------------------------------------------------------------------------------------------------------------------------------------------------------------------------------------------------------------------------------------------|--------|
| <p>szeged or pecs or gyor or nyiregyhaza or kecskemet or szekesfehervar or szombathely or bekescsaba or eger or tatabanya or salgotarjan or kaposvar or szekszard or greece or "hellenic republic" or greek* or ellada or "elliniki dimokratia" or hellas or hellenes or attica or attiki or makedonia or macedonia or thraki or thrace or crete or kriti or epirus or ipeiros or "ionia nisias" or "ionian nesos" or "ionian islands" or "north aegean" or "aegean islands" or "nisois agaiou" or "notio aigaios" or peloponnese or peloponnisos or "voreio aigaios" or "south aegean" or thessaly or thessalia).ab.ti.</p>                                                                                                                                                                                                                                                                                                                                                                                                                                                                                                                                                                                                                                                                                                                                                                                                                                                                                                                                                                                                                                                                                                                                                                                                                                                                                                                                                                                                                                                                                                                                                                                                                                                                                                                                                                                                                                                                                                                                                                                                                                                                                                                                                                                                                                                                                                                                                                                                                                                                                                                                                                                                                                                                                                                                                                                                                                                                                                                                                                                                                                                                                                                                                                                                                                                                                                                                                                                                                                                                                                                                                                                                                                                                         |        |
| <p>37 (cycklades or kiklades or dodecanese or dodekanisa or "mount athos" or "omikronros alphathos" or athens or athina or thessaloniki or thessalonica or patras or patra or heraklion or heraclion or iraklion or irakleion or iraklio or larissa or larisa or volos or rhodes or rodos or ioannina or janina or yannena or chania or chalcis or chalkida or alexandroupoli or german* or deutschland or deutsch* or bundesrepublik or westdeutschland or ostdeutschland or baden or wuerttemberg or wurtemberg or bayern or bavaria or berlin or brandenburg or bremen or hamburg or hessen or hesse or hessia or mecklenburg or vorpommern or pomerania or niedersachsen or neddersassen or saxony or niederbayern or "north rhine" or westphalia or westfalen or "rhineland palatinate" or "rheinland pfalz" or saarland or sachsen or "schleswig holstein" or thuringia or thuringen or thuringen or freiburg or karlsruhe or calruhe or stuttgart or tuingen or oberbayern or "upper palatinate" or oberpfalz" or franken or franconia or oberfranken or mittelfranken or schwaben or unterfranken or swabia or darmstadt or giessen or kassel or arnsberg or cologne or koln or koeln or detmold or dusseldorf or duesseldorf or munster or muenster or munich or munchen or muenchen or frankfurt or dortmund or essen or nurnberg or nuernberg or nuremberg or hanover or hannover or leipzig or dresden or ruhrgebiet or revier or ruhrpott or pott or ruhr or france or french* or francais or alsace or aquitaine or auvergne or brittany or bretagne or bourgogne or burgundy or "champagne ardenne" or "franche comte" or "ile de france" or "languedoc roussillon" or limousin or lorraine or normandie or normandy or "midi pyrenees" or "nord pas de calais" or picardie or picardy or "poitou charentes" or provence or "rhone alpes" or corse or corsica or guiana or guyane or guadeloupe or martinique or reunion or mayotte or ain or aise or allier or "alpes de haute provence" or "haute alpes" or "alpes maritimes" or ardeche or ardennes or ariege or aube or aude or aveyron or "bas rhin" or "bouches du rhone" or calvados or cantal or charente or cher or correze or "corse du sud" or cote* or azur* or creuse or "deux sevres" or dordogne or doubs or drome or essonne or eure or finistere or gard or gers or gironde or "haute corse" or "haute garonne" or "haute marne" or "hautes alpes" or "haute saone" or "haute savoie" or "hautes pyrenees" or "haute vienne" or "haut rhin" or "hauts de seine" or herault or "ille et vilaine" or indre or isere or jura or landes or loire or loiret (lot and (departement or department)) or "lot et garonne" or "loir et cher" or lozere or manche or marne or mayenne or "meurthe et moselle" or meuse or morbihan or moselle or (nord and (department or departement)) or nievre or oise or orne or "pas de calais" or paris or "puy de dome" or "pyrenees atlantiques" or "pyrenees orientales" or rhone or sarthe or savoie or "seine et marne" or "seine maritime" or somme or tarn or "territoire de belfort" or "val de marne" or var or vaucluse or vendee or vienne or vosges or yonne or yvelines or marseille or lyon or nice or nantes or strasbourg or montpellier or bordeaux or lille or toulouse or finland or finnish* or suomi* or lapland or lappi or lapland or ostrobothnia or pohjanmaa or osterbotten or kainuu or kajanaland* or karelia or karjala or karelen or savonia or savo or savolax or pirkanmaa or birkaland or satakunta or satakunda or tavastia or tavastland or "pajjat hame" or "kanta hame" or uusimaa or nyland or kymenlaakso or kymmenedalen or aland or ahvenanmaa or helsinki or helsingfors or espoo or esbo or tampere or tammerfors or vantaa or vanda or oulu or uleaborg or turku or abo or jyvaskyla or kuopio or lathi or lahtis or kouvola or estonia* or eesti or esti or tallinn or harju or harjumaa or hiiu or hiiumaa or "ida viru" or "ida virumaa" or jarvamaa or jarva or jogevamaa or jogeva or laanemaa or laane or parnumaa or polva or polvamaa or rapla or raplamaa or saare or saaremaa or tartu or tartumaa or valga or valgamaa or valgamaakond or viljandimaa or voru or vorumaa or narva or parnu or kohtla jarve or viljandi).ab.ti.</p> | 708042 |
| <p>38 (rakvere or maardu or sillamae or kuressaare or romania* or rumania* or roumania* or romanian or roman or bucharest or bucuresti or alba or brasov or covasna or harghita or mures or sibiu or bacau or botosani or iasi or neamt or suceava or vaslui or bihor or "bistrita nasaud" or cluj or maramures or salaj or "satu mare" or arges or calarasi or dambovita or giurgiu or ialomita or prahova or teleorman or braila or buzau or galati or tulcea or vrancea or dolj or gorj or mehedinți or (olt and (river or county or region or judetul or raul)) or valcea or vilcea or</p>                                                                                                                                                                                                                                                                                                                                                                                                                                                                                                                                                                                                                                                                                                                                                                                                                                                                                                                                                                                                                                                                                                                                                                                                                                                                                                                                                                                                                                                                                                                                                                                                                                                                                                                                                                                                                                                                                                                                                                                                                                                                                                                                                                                                                                                                                                                                                                                                                                                                                                                                                                                                                                                                                                                                                                                                                                                                                                                                                                                                                                                                                                                                                                                                                                                                                                                                                                                                                                                                                                                                                                                                                                                                                                       | 458552 |

|                                                                                                                                                                                                                                                                                                                                                                                                                                                                                                                                                                                                                                                                                                                                                                                                                                                                                                                                                                                                                                                                                                                                                                                                                                                                                                                                                                                                                                                                                                                                                                                                                                                                                                                                                                                                                                                                                                                                                                                                                                                                                                                                                                                                                                                                                                                                                                                                                                                                                                                                                                                                                                                                                                                                                                                                                                                                                                                                                                                                                                                                                                                                                                                                                                                                                                                                                                                                                                                                                                                                                                                                                                                                                                      |        |
|------------------------------------------------------------------------------------------------------------------------------------------------------------------------------------------------------------------------------------------------------------------------------------------------------------------------------------------------------------------------------------------------------------------------------------------------------------------------------------------------------------------------------------------------------------------------------------------------------------------------------------------------------------------------------------------------------------------------------------------------------------------------------------------------------------------------------------------------------------------------------------------------------------------------------------------------------------------------------------------------------------------------------------------------------------------------------------------------------------------------------------------------------------------------------------------------------------------------------------------------------------------------------------------------------------------------------------------------------------------------------------------------------------------------------------------------------------------------------------------------------------------------------------------------------------------------------------------------------------------------------------------------------------------------------------------------------------------------------------------------------------------------------------------------------------------------------------------------------------------------------------------------------------------------------------------------------------------------------------------------------------------------------------------------------------------------------------------------------------------------------------------------------------------------------------------------------------------------------------------------------------------------------------------------------------------------------------------------------------------------------------------------------------------------------------------------------------------------------------------------------------------------------------------------------------------------------------------------------------------------------------------------------------------------------------------------------------------------------------------------------------------------------------------------------------------------------------------------------------------------------------------------------------------------------------------------------------------------------------------------------------------------------------------------------------------------------------------------------------------------------------------------------------------------------------------------------------------------------------------------------------------------------------------------------------------------------------------------------------------------------------------------------------------------------------------------------------------------------------------------------------------------------------------------------------------------------------------------------------------------------------------------------------------------------------------------------|--------|
| <p>arad or caras-severin or hunedoara or timis or ilfov or timisoara or constanta or craiova or ploiesti or oradea or cluj-napoca or deva or portugal or portugues* or lisboa or lisbon or leira or santarem or beja or faro or evora or portalegre or "castelo branco" or guarda or aveiro or viseu or braganca or "vila real" or "viana do castelo" or alentejo or azores or acores or madeira or "os montes" or (ave and (community or intermunicipal or comunidade)) or mondego or vouga or beira or cavado or lafoes or douro or porto or tejo or minho or setubal or pinhal or "serra da estrela" or tamega or algarve or gaia or amadora or braga or (agualva and cacem) or funchal or coimbra or almada or poland or polska or polish or polski or pole or poles or polak or polka or polacy or warsaw or warszawa or wielkopolskie or pomerania* or pomorskie or kuyavian or kujawsko or malopolskie or lodz or lodzkie or silesia* or dolnoslaskie or lublin or lubelskie or lubus or lubusz or lubuskie or masovia or mazowske or masovian or mazowieckie or opole or opolskie or podlaskie or podlachia or podlasie or subcarpathian* or carpathian* or podkarpackie or swietokrzyskie or slaskie or slask or "varmia mazuria" or "varmian mazurian" or "varmia masuria" or "varmian masurian" or "warmia mazury" or "warminsko mazurskie" or zachodniopomorskie or krakow or cracow or wroclaw or poznan or gdansk or szczecin or bydgoszcz or katowice or bialystok or olsztyn or kielce or "zielona gora" or torun or "gorzow wielkopolski" or netherlands or nederland* or dutch* or amsterdam or drenthe or flevoland or friesland or fryslan or gelderland or guelders or groningen or limburg or "north brabant" or "noord brabant" or holland or overijssel or overijssel or utrecht or zeeland or rotterdam or hague or eindhoven or tilburg or almere or breda or nijmegen or nimeguen or malta or maltese or valletta or gozo or ghawdex or luxembourg* or luxemburg or letzebuerg or diekirch or grevenmacher or lithuania* or "lietuvos respublika" or lietuva or lietuviu or vilnius or vilniaus or kaunas or kauno or klaipeda or klaipedos or panevezys or panevezio or siauliai or siauliu or alytus or alytaus or taurages or taurage or marijampoles or marijampole or telsiu or telsiai or utenos or utena or mazeikiai or jonava or mazeikiu or jonavos or latvi* or latvija* or riga or courland or kurzeme or kurland or latgale or lettgalia or latgola or vidzeme or vidumo or semigallia or semigalia or zemgale or pieriga or daugavpils or dinaburg or liepaja or libau or jelgava or jurmala or jekabpils or jakobstadt or rezekne or rezne or rositten or valmiera or wolmar or ventspils or windau or denmark or danish* or danmark or dansk* or hovedstaden or midtjylland or sjælland or sealand or syddanmark or jutland or jylland or nordjylland or sonderjyllands or "zealand region" or "region zeeland" or hillerod or viborg or aalborg or alborg or soro or vejle or copenhagen or kobenhavn or arhus or aarhus or roskilde or odense or frederiksberg or esbjerg or gentofte or gladsaxe or randers or kolding or czech* or cesk* or stredoces* or jihoco* or bohemia or bohemian or kralovehradec* or "hradec kralove" or karlovars* or "karlovy vary" or liberec* or moravskoslezs* or "moravian silesian" or olomouc* or pardubic* or pardubice or plzen* or pilsen or prage or praha or prag or jihomorav* or moravia or moravian or morava or usteck* or usti or vysocina or zlin or zlinsk* or "ceske budejovice" or budweis or brno or ostrava or cyprus or cypriot* or kypros or kibris or kypriaki* or nicosia or lefkosa).ab.ti.</p> |        |
| <p>39 (lefkosia or famagusta or magusa or ammochosstos or gazimagusa or kyrenia or girne or keryneia or larnaca or larnaka or limassol or lemesos or limasol or leymosun or paphos or pafos or baf or gazibaf or protaras or pergamos or beyarmudu or morfou or guzelyurt or omorfo or morphou or aradippou or croatia* or hrvatsk* or hrvati or bjelovar or "bjelovarsko bilogorska" or "brod posavina" or "brodsko posavska" or "dubrovnik neretva" or "dubrovačko neretvanska" or istria or istarska or karlovačka or karlovac or "koprivnicko krizevačka" or koprivnica or krizevci or "krapina zagorje" or "krapinsko zagorska" or "lika senj" or "licko senjska" or medimurska or medimurje or osijek or osjecko or baranja or "osječko baranjska" or "požega slavonia" or "pozesko slavonska" or "primorje gorski kotar" or "primorsko goranska" or "sibensko kninska" or "sibensko kninske" or sibenik or knin or sisak or "sisacko moslavacka" or moslavina or "splitsko dalmatinska" or split or dalmatia or varazdin or varazdinska or viroviticko-podravska or virovitica or podravina or "vukovarsko srijemska" or vukovar or srijem or zadar or zadarska or zagreb or zagrebacka or rijeka or "velika gorica" or "slavonski brod" or pula or bulgaria* or sofia or gabrovo or blagoevgrad or "pirin macedonia" or burgas or dobrich or haskovo or kardzhali or kurdzhali or kyustendil or lovech or montana or pazardzhik or pernik or pleven or plovdiv or razgrad or rousse or ruse or shumen or sliven or silistra or smolyan or "stara zagora" or targovishte or varna or tarnovo or vidin or vratsa or vratza or yambol or belgi* or belge or belgisch or brussel* or bruxelles or bruxelloise or flemish or flamand or flemisch or flanders or flandern or flandre or vlaanderen or vlaams or flamande or waals or walloon* or wallon* or antwerp* or anvers or ostflandern or "vlaams brabant" or limburg or limburg or hainault or hainaut or</p>                                                                                                                                                                                                                                                                                                                                                                                                                                                                                                                                                                                                                                                                                                                                                                                                                                                                                                                                                                                                                                                                                                                                                                                                                                                                                                                                                                                                                                                                                                                                                                                                                                                                                                                              | 581171 |

|                                                                                                                                                                                                                                                                                                                                                                                                                                                                                                                                                                                                                                                                                                                                                                                                                                                                                                                                                                                                                                                                                                                                                                                                                                                                                                                                                                                                                                                                                                                                                                                                                                                                                                                                                                                                                                                                                                                                                                                                                                                                                                                                                                                                                                                                                                                                                                                                                                                                                                                                                                                                                                                                                                                                                                      |       |
|----------------------------------------------------------------------------------------------------------------------------------------------------------------------------------------------------------------------------------------------------------------------------------------------------------------------------------------------------------------------------------------------------------------------------------------------------------------------------------------------------------------------------------------------------------------------------------------------------------------------------------------------------------------------------------------------------------------------------------------------------------------------------------------------------------------------------------------------------------------------------------------------------------------------------------------------------------------------------------------------------------------------------------------------------------------------------------------------------------------------------------------------------------------------------------------------------------------------------------------------------------------------------------------------------------------------------------------------------------------------------------------------------------------------------------------------------------------------------------------------------------------------------------------------------------------------------------------------------------------------------------------------------------------------------------------------------------------------------------------------------------------------------------------------------------------------------------------------------------------------------------------------------------------------------------------------------------------------------------------------------------------------------------------------------------------------------------------------------------------------------------------------------------------------------------------------------------------------------------------------------------------------------------------------------------------------------------------------------------------------------------------------------------------------------------------------------------------------------------------------------------------------------------------------------------------------------------------------------------------------------------------------------------------------------------------------------------------------------------------------------------------------|-------|
| <p>henegouwen or hennegau or liege or luik or luttich or namur or namen or westflandern or "waals brabant" or ghent or gent or gand or charleroi or bruges or brugge or schaerbeek or schaarbeek or anderlecht or leuven or louvain or hasselt or mons or wavre or waver or austria* or vienna or wien or osterreich* or sudosterreich or westosterreich or niederosterreich or burgenland or carinthia or karnten or oberosterreich or styria or steiermark or salzburg or saizburg or tyrol or tirol or becs or vorarlberg or bregenz or linz or eisenstadt or innsbruck or graz or klagenfurt or polten or villach or wels or dornbirn or feldkirch or steyr or iceland or icelandic* or islenska* or icelander* or islendinga* or islendigar or inslenska or reykjavik or reykjavikurborg or hofudborgarsvaedid or sudurnes or vesturland or vestfiridir or westfjords or nordurland or austurland or sudurland or kopavogur or hafnarfjordur or Akureyri or Gardabaer or Mosfellsbaer or Keflavik or Akranes or Selfoss or Seltjarnarnes or switzerland or schweiz or schweizerische or swiss or suisse or aargau or argovia or ausserrhoden or "outer rhodes" or innerrhoden or "inner rhodes" or basel or bern or berne or fribourg or freiburg or geneva or geneve or glarus or graubunden or grisons or grigioni or jura or lucerne or luzern or neuchatel or zurich or (uri and (canton or kanton)) or schwyz or obwalden or nidwalden or zug or solothurn or schaffhausen or thurgau or thurgovia or ticino or tessin or vaud or valais or wallis or "st gallen" or lausanne or winterthur or winterthour or lugano or biel or bienne or norway or norwegian* or norge or noreg or norgga or ostfold or akershus or oslo or hedmark or oppland or buskerud or vestfold or telemark or "aust agder" or "vest agder" or rogaland or hordaland or "sogn og fjordane" or "sogn and fjordane" or "sogn fjordane" or "more og romsdal" or "more and romsdal" or "more romsdal" or trondelag or nordland or troms or finnmark or bergen or stavanger or sandnes or trondheim or kristiansand or drammen or fredrikstad or sarpsborg or porsgrunn or skien or tonsberg or alesund or liechtenstein or vaduz or triesenberg or triesen or schellenberg or schaan or ruggell or planken or mauren or gamprin or eschen or balzers or turkey or turkiye or turkish or istanbul or marmara or aegean or anatolia or "black sea" or tekirdag or balikesir or izmir or aydin or manisa or bursa or kocaali or ankara or konya or antalya or adana or hatay or kirikkale or kayseri or zonguldak or kastamonu or samsun or trabzon or erzurum or agri or malatya or (van and (region or subregion or bolgesi)) or gaziantep or sanliurfa or mardin or mersin).ti,ab.</p> |       |
| <p>40 ("Esch sur Alzette" or "Esch Uelzecht" or "Esch an der Alzette" or "Esch an der Alzig" or Dudelange or Diddeleng or Dudelingen or Duedelingen or Schifflange or Scheffleng or Schifflingen or Bettembourg or Beetebuerg or Bettemburg or Petange or Peiteng or Petingen or Ettelbruck or Ettelbreck or Ettelbrueck or Dikrech or Strassen or Stroossen or Bertrange or Bartreng or Bartringen or Latgalia or Ogre or "Valle d Aosta" or "Vallee d Aoste Venetia" or "Aosta Valley" or "Vallee d'Aoste" or "Valle d'Aosta" or "na Iarmhi" or "an Longfoirt" or Muineachan or "Contae Lu" or "Cill Dara" or "Chill Dara" or "Ath Cliath" or "Chill Mhantain" or "Loch Garman" or "Fine Gall" or "Cill Mhantain" or Ceatharlach or "An Mhi" or Mhuineachain or "An Uaimh" or "Dun Dealgan" or "Droichead Atha" or Mumhain or Dunnya or Dinnygal or "Cuige Laighean" or Connachta or Sord or "Cuige Mumhan" or Laighin or Liatroma or Liatroim or "Dhun na nGall" or Sligeach or Shligigh or "Mhaigh Eo" or "Maigh Eoor Ros comain" or Gaillimh or "na Gaillimhe" or "An Clar" or "an Chlair" or "Thiobraid Arann" or Luimneach or Luimnigh or "Chill Chainnigh" or "Cill Chainnigh" or Corcaigh or Ciarrai or Chiarrai or "Tiobraid Arann" or Watterford or "Port Laise" or "An Longfort" or "Contae na Mi" or "An Cabhan" or "An Cabhain" or "Laoise" or "Uibh Fhaili" or "Ionian island" or "Northern Aegean" or Petthalia or "Southern Aegean" or Cyclades or Piraeus or Pireas or "Aegean island" or "Voreio Aigaiou" or "Oros Athos" or "Perifereia Ipeirou" or "North Alfold" or "South Alfold" or "Stara Zagora" or Bulgariya or Balgarija or Rusenka or Sofyiska or "Veliko Tarnovoor" or Suomalaiset or Suomen or "Laane Virumaa" or Eestlased or Eestlane or Finn or Finns or Frederiksberg or Storstrom or Bornholm or Ringkjobing or Frederiksborg or danes or dane or Holomoc or Cestina or Cech or Engomi or Prague or Eglence or Aglandjia or Aglantzia or "Kato Polemidia" or "Kato Polemidhia" or Aradhippou or Iskele or Strovolos or Lakatamia or Lakadamyia or Kyprioi or Goettingen or Bonn or Gottingen or Mitteldeutschland or Rhein or Rhine or Braunschweig or Oldenburg or "Northern Rhine" or "Seine Saint Denis" or "Outre Mer" or Oise or "Noord-Nauw van Kales" or "Rono Arpes" or "Rose Aups" or "Peitau Charantas" or "Poetou-Cherentes" or "Mieidia Pireneus" or "Broiou al Liger" or "Pays de la Loire" or "Mediodia Pireneos" or Lothringen or "Miegjorn Pireneus" or Lottringe or Lemosin or "Frantche Comte" or Normandie or Aguiene or Auvernhe or Elsass or Auvernha or Aquitania or Bregogne or Akitania or "Lengadoc Rosselhon" or "Llenguadoc-Rossello" or "Franche Comtat" or Lahti).ti,ab.</p>                        | 23298 |

|    |                                                                                                                                                                                                                                                                                                                                                                                                                                                                                                                                                                                                                                                                                                                                                                                                                                                                                                                                                                                                                                                                                                                                                                                                                                                                                                                                                                                                                                                                                                                                                                                                                                                                                                                                                                                                                                                                                                                                                                                                                                                                                                                                             |         |
|----|---------------------------------------------------------------------------------------------------------------------------------------------------------------------------------------------------------------------------------------------------------------------------------------------------------------------------------------------------------------------------------------------------------------------------------------------------------------------------------------------------------------------------------------------------------------------------------------------------------------------------------------------------------------------------------------------------------------------------------------------------------------------------------------------------------------------------------------------------------------------------------------------------------------------------------------------------------------------------------------------------------------------------------------------------------------------------------------------------------------------------------------------------------------------------------------------------------------------------------------------------------------------------------------------------------------------------------------------------------------------------------------------------------------------------------------------------------------------------------------------------------------------------------------------------------------------------------------------------------------------------------------------------------------------------------------------------------------------------------------------------------------------------------------------------------------------------------------------------------------------------------------------------------------------------------------------------------------------------------------------------------------------------------------------------------------------------------------------------------------------------------------------|---------|
| 41 | (Lunnonderrie or Dyfed or Merionethshire or Anthrim or Radnorshire or Montgomeryshire or Aontroim or "Contae Aontroma" or Entrim or "Ard Mhacha" or Airmagh or "An Dun" or "an Duin" or Doon or Doun or "Fear Manach" or "Fhear Manach" or Fermanay or Doire or Dhoire or Banffshire or Berwickshire or Cromartyshire or Dumfriesshire or Haddingtonshire or Kincardineshire or Inverness or Dumbarton or Kirkcudbrightshire or Nairnshire or Peeblesshire or Perthshire or Elginshire or Ross* or Roxburghshire or Selkirkshire or Linlithgowshire or Stirlingshire or Zetland or Wigtownshire or Brecknockshire or Caernarfonshire or Clwyd or Cardiganshire or Great Britain or GB or Scots or Cymru or "Isle of Ely" or Cleveland or Cornwall or Hereford or Huntingdon or Humberside or Huntingdonshire or Worcester or Middlesex or Salop or Westmorland or "Isle of Man" or Jersey or Guernsey or "Channel Islands" or Forfarshire or Swedes or Swede or Sodermanlands or "Balear Islands" or Arago or Euskadi or "Baske region" or Galiza or "Las Palmas" or Slovenci or Slovene or Jugovzhodna or Drava or Savinja or Mura or "Central Sava" or Posavska or "Lower Sava" or Laibach or Lubiana or Creina or Carnium or "Marburg an der Drau" or Chreina or Krainbur or Kopar or Wollan or Woellan or Neustadtl or Slovaci or Slovenki or Posonium or Besztercebanya or Neutra or Nyitra or Nyitria or Kaschau or Kassa or Presporok or Pressburg or Neusohl or Nagyszombat or Tyrnau or Trentschin or Trencsen or Zvolen or Deutschendorf or Turocszentmarton or Sillein or Tyrnavia or Varat or Temesva or Timisvar or Varad or Jassy or Lassy Galatz or Galac or Tomis or Konstantia or Kostence or Klausenburg or Kolozsvar or Kronstadt or Brasso or Brassovia or Coron or Rumani or Romani or "Alto Tras-os-Montes" or Oporto or Cimbra or Maltin or "s-Gravenhage" or "Den Haag" or Frisia or "Ill Belt" or Birkirkara or "B Kara" or Birchircara or Mosta or Qormi or "St Paul s Bay" or "St Paul's Bay" or "Pawl il Bahar" or Zabbar or Sliema or Naxxar or Gwann or "St John" or Zebbug or "Citta rohan" or Fgura).ab.ti. | 77622   |
| 42 | or/32-41                                                                                                                                                                                                                                                                                                                                                                                                                                                                                                                                                                                                                                                                                                                                                                                                                                                                                                                                                                                                                                                                                                                                                                                                                                                                                                                                                                                                                                                                                                                                                                                                                                                                                                                                                                                                                                                                                                                                                                                                                                                                                                                                    | 4204562 |
| 43 | 15 and 22 and 27 and 31 and 42                                                                                                                                                                                                                                                                                                                                                                                                                                                                                                                                                                                                                                                                                                                                                                                                                                                                                                                                                                                                                                                                                                                                                                                                                                                                                                                                                                                                                                                                                                                                                                                                                                                                                                                                                                                                                                                                                                                                                                                                                                                                                                              | 467     |
| 44 | limit 43 to yr="2020-Current"                                                                                                                                                                                                                                                                                                                                                                                                                                                                                                                                                                                                                                                                                                                                                                                                                                                                                                                                                                                                                                                                                                                                                                                                                                                                                                                                                                                                                                                                                                                                                                                                                                                                                                                                                                                                                                                                                                                                                                                                                                                                                                               | 454     |
| 45 | 15 and 22 and 27 and 31                                                                                                                                                                                                                                                                                                                                                                                                                                                                                                                                                                                                                                                                                                                                                                                                                                                                                                                                                                                                                                                                                                                                                                                                                                                                                                                                                                                                                                                                                                                                                                                                                                                                                                                                                                                                                                                                                                                                                                                                                                                                                                                     | 1539    |
| 46 | limit 45 to yr="2020-Current"                                                                                                                                                                                                                                                                                                                                                                                                                                                                                                                                                                                                                                                                                                                                                                                                                                                                                                                                                                                                                                                                                                                                                                                                                                                                                                                                                                                                                                                                                                                                                                                                                                                                                                                                                                                                                                                                                                                                                                                                                                                                                                               | 1451    |

**Supplementary Table 2. Descriptive characteristics of included studies including NPIs implemented in parallel (n=19)**

| First author, year     | Country, area                   | Timeframe                                                         | COVID-19 diagnosis          | SARS-CoV-2 strain          | Parallel NPIs                                                                                                                                                                                                                                                                                                                      |
|------------------------|---------------------------------|-------------------------------------------------------------------|-----------------------------|----------------------------|------------------------------------------------------------------------------------------------------------------------------------------------------------------------------------------------------------------------------------------------------------------------------------------------------------------------------------|
| Abbas 2021 (29)        | Sweden                          | 4 April 2020 - 8 May 2020                                         | PCR and/or serology         | Not mentioned              | Not mentioned                                                                                                                                                                                                                                                                                                                      |
| Bistaraki 2021 (9)     | Greece                          | From 1 October to 9 December 2020                                 | PCR                         | Not mentioned              | (i) Mandatory mask use, (ii) Lockdown on 7 November 2020, (iii) Cases were instructed to isolate for 10 days                                                                                                                                                                                                                       |
| Calvani 2021 (32)      | Italy                           | October 16 to December 19, 2020                                   | Ag RDT, NAAT                | Not mentioned              | Nursery, primary, and middle/junior high schools were opened during our study period, while high schools were opened only until October 26th, when remote teaching was activated.                                                                                                                                                  |
| Charbonnier 2021 (10)  | Paris, France                   | Between May 8 and July 27, 2020                                   | RT-PCR and serologica I RDT | Not mentioned              | Positive cases were isolated for 14 days and those with negative test were isolated for 7 days. Protective measures to avoid viral transmission were explained, along with distribution of masks and hydroalcoholic lotions                                                                                                        |
| Chudasama 2021 (33)    | England                         | August to October 2021                                            | PCR, LFD                    | Not mentioned              | Easing of COVID-19 restrictions in England in the summer of 2021, including the removal of face coverings or masks from 19 July 2021 and the requirement for self-isolation of close contacts of cases who are children or fully vaccinated.                                                                                       |
| Dupraz 2021 (25)       | Canton of Vaud, Switzerland     | February 27 - April 1, 2020                                       | NAAT                        | Not mentioned              | Not mentioned                                                                                                                                                                                                                                                                                                                      |
| Galow 2021 (11)        | Dresden, Germany                | June 2020                                                         | PCR                         | Not mentioned              | Temporal separation in the use of common rooms was implemented most commonly followed by mask wearing of the index person                                                                                                                                                                                                          |
| Hare 2021 (30)         | Ireland                         | 25 June - 15 November 2020 (case study: 13 August-25 August 2020) | PCR                         | Not mentioned              | Not mentioned                                                                                                                                                                                                                                                                                                                      |
| Koureas 2021 (27)      | Larissa, Greece                 | 8 April–4 June 2020                                               | PCR                         | Not mentioned              | (i) large-scale population screening, (iv) contact tracing of confirmed cases, (v) repeated PCR testing of street vendors, (vi) population screening in all major Roma settlements of the region, (vii) movement restrictions and gathering prohibition, (viii) the isolation of confirmed cases in a specified isolation facility |
| Kuwelker 2021 (31)     | Bergen, Norway                  | From 28th February to 4th April 2020                              | PCR                         | Not mentioned              | Index patients were home isolated, and their household members were instructed to quarantine                                                                                                                                                                                                                                       |
| Loenenbach 2021 (15)   | Hesse, Germany                  | January-February 2021                                             | PCR                         | SARS-CoV-2 variant B.1.1.7 | Not mentioned                                                                                                                                                                                                                                                                                                                      |
| Lyngse 2021 (16)       | Denmark                         | January 11 to February 7, 2021                                    | PCR                         | SARS-CoV-2 variant B.1.1.7 | Not mentioned                                                                                                                                                                                                                                                                                                                      |
| Maltezos 2020 (17)     | Greece                          | From February 26 to June 30, 2020                                 | PCR                         | Not mentioned              | Contacts' isolation for 14 days                                                                                                                                                                                                                                                                                                    |
| Maltezos 2021 (18)     | Athens and Thessaloniki, Greece | From 26 February to 3 May 2020                                    | PCR                         | Not mentioned              | Close contacts were isolated for 14 days following the last contact with the COVID-19 case                                                                                                                                                                                                                                         |
| Miller 2021 (19)       | England                         | Between 30th March and 17th November 2020                         | PCR                         | Not mentioned              | Isolation of cases and quarantine of contacts                                                                                                                                                                                                                                                                                      |
| Posfay-Barbe 2020 (21) | Switzerland                     | 10 March to 10 April 2020                                         | PCR                         | Not mentioned              | Not mentioned                                                                                                                                                                                                                                                                                                                      |
| Soriano-Arandes 2021   | Catalonia,                      | 1 July to 31 October                                              | PCR/rapid                   | Not                        | Children >6 years old wore masks in school                                                                                                                                                                                                                                                                                         |

|                 |         |                                |              |               |               |
|-----------------|---------|--------------------------------|--------------|---------------|---------------|
| (23)            | Spain   | 2020                           | antigen test | mentioned     |               |
| Stich 2021 (28) | Germany | 11 May to 1 August 2020        | PCR          | Not mentioned | Not mentioned |
| Telle 2021 (24) | Norway  | 1 March 2020 to 1 January 2021 | PCR          | Not mentioned | Not mentioned |



Supplementary Table 3: Results from the JBI critical appraisal tool for cohort studies (n=11): Results reflecting the quality of the study to address the specific aim of the review and not the study overall.

| First author, year           | Q1<br>Were the two groups similar and recruited from the same population? | Q2<br>Were the exposures measured similarly to assign people to both exposed and unexposed groups? | Q3<br>Was the exposure measured in a valid and reliable way? | Q4<br>Were confounding factors identified? | Q5<br>Were strategies to deal with confounding factors stated? | Q6<br>Were the groups/participants free of the outcome at the start of the study (or at the moment of exposure)? | Q7<br>Were the outcomes measured in a valid and reliable way? | Q8<br>Was the follow up time reported and sufficient to be long enough for outcomes to occur? | Q9<br>Was follow up complete, and if not, were the reasons to loss to follow up described and explored? | Q10<br>Were strategies to address incomplete follow up utilized? | Q11<br>Was appropriate statistical analysis used? | Overall Score reflecting the quality of the study to address the specific aim of the review |
|------------------------------|---------------------------------------------------------------------------|----------------------------------------------------------------------------------------------------|--------------------------------------------------------------|--------------------------------------------|----------------------------------------------------------------|------------------------------------------------------------------------------------------------------------------|---------------------------------------------------------------|-----------------------------------------------------------------------------------------------|---------------------------------------------------------------------------------------------------------|------------------------------------------------------------------|---------------------------------------------------|---------------------------------------------------------------------------------------------|
| Bistaraki et al., 2021       | YES                                                                       | YES                                                                                                | YES                                                          | YES                                        | YES                                                            | YES                                                                                                              | YES                                                           | YES                                                                                           | UNCLEAR                                                                                                 | UNCLEAR                                                          | YES                                               | 9/11                                                                                        |
| Charbonnier et al., 2021     | YES                                                                       | YES                                                                                                | YES                                                          | NO                                         | NO                                                             | YES                                                                                                              | YES                                                           | YES                                                                                           | YES                                                                                                     | UNCLEAR                                                          | YES                                               | 8/11                                                                                        |
| Galow et al., 2021           | YES                                                                       | YES                                                                                                | YES                                                          | YES                                        | YES                                                            | YES                                                                                                              | YES                                                           | UNCLEAR                                                                                       | UNCLEAR                                                                                                 | UNCLEAR                                                          | YES                                               | 8/11                                                                                        |
| Loenenbach et al., 2021      | YES                                                                       | YES                                                                                                | YES                                                          | YES                                        | YES                                                            | YES                                                                                                              | YES                                                           | UNCLEAR                                                                                       | UNCLEAR                                                                                                 | UNCLEAR                                                          | YES                                               | 8/11                                                                                        |
| Lyngse et al., 2021          | YES                                                                       | YES                                                                                                | YES                                                          | YES                                        | YES                                                            | YES                                                                                                              | YES                                                           | YES                                                                                           | YES                                                                                                     | UNCLEAR                                                          | YES                                               | 10/11                                                                                       |
| Maltezou et al., 2020        | YES                                                                       | YES                                                                                                | YES                                                          | YES                                        | YES                                                            | YES                                                                                                              | YES                                                           | UNCLEAR                                                                                       | UNCLEAR                                                                                                 | UNCLEAR                                                          | YES                                               | 8/11                                                                                        |
| Maltezou et al., 2021        | YES                                                                       | YES                                                                                                | YES                                                          | YES                                        | YES                                                            | YES                                                                                                              | YES                                                           | YES                                                                                           | YES                                                                                                     | UNCLEAR                                                          | YES                                               | 10/11                                                                                       |
| Miller et al., 2021          | YES                                                                       | YES                                                                                                | YES                                                          | YES                                        | YES                                                            | YES                                                                                                              | YES                                                           | YES                                                                                           | YES                                                                                                     | YES                                                              | YES                                               | 11/11                                                                                       |
| Posfay-Barbe et al., 2020    | YES                                                                       | YES                                                                                                | YES                                                          | NO                                         | NO                                                             | YES                                                                                                              | YES                                                           | YES                                                                                           | YES                                                                                                     | YES                                                              | YES                                               | 9/11                                                                                        |
| Soriano-Arandes et al., 2021 | YES                                                                       | YES                                                                                                | YES                                                          | YES                                        | YES                                                            | YES                                                                                                              | YES                                                           | YES                                                                                           | YES                                                                                                     | UNCLEAR                                                          | YES                                               | 10/11                                                                                       |
| Telle et al., 2021           | YES                                                                       | YES                                                                                                | YES                                                          | YES                                        | UNCLEAR                                                        | YES                                                                                                              | YES                                                           | YES                                                                                           | YES                                                                                                     | YES                                                              | YES                                               | 10/11                                                                                       |

Supplementary Table 4: *Results from the JBI critical appraisal tool for cross-sectional studies (n=4)* : Results reflecting the quality of the study to address the specific aim of the review and not the study overall.

| First author, year     | Q1 - Were the criteria for inclusion in the sample clearly defined? | Q2 - Were the study subjects and the setting described in detail? | Q3 – Was the exposure measured in a valid and reliable way? | Q4 – Were objective, standard criteria used for measurement of the condition? | Q5 – Were confounding factors identified? | Q6 - Were strategies to deal with confounding factors stated? | Q7 - Were the outcomes measured in a valid and reliable way? | Q8 – Was appropriate statistical analysis used? | Overall Assessment reflecting the quality of the study to address the specific aim of the review |
|------------------------|---------------------------------------------------------------------|-------------------------------------------------------------------|-------------------------------------------------------------|-------------------------------------------------------------------------------|-------------------------------------------|---------------------------------------------------------------|--------------------------------------------------------------|-------------------------------------------------|--------------------------------------------------------------------------------------------------|
| Chudasama et al., 2021 | YES                                                                 | YES                                                               | YES                                                         | YES                                                                           | YES                                       | NO                                                            | YES                                                          | YES                                             | 7/8                                                                                              |
| Dupraz et al., 2021    | YES                                                                 | YES                                                               | YES                                                         | YES                                                                           | YES                                       | YES                                                           | YES                                                          | YES                                             | 8/8                                                                                              |
| Koureas et al., 2021   | YES                                                                 | YES                                                               | YES                                                         | YES                                                                           | YES                                       | YES                                                           | YES                                                          | YES                                             | 8/8                                                                                              |
| Stich et al., 2021     | YES                                                                 | YES                                                               | YES                                                         | YES                                                                           | YES                                       | YES                                                           | YES                                                          | YES                                             | 8/8                                                                                              |

Supplementary Table 5: Results from the JBI critical appraisal tool for case reports (n=3) : Results reflecting the quality of the study to address the specific aim of the review and not the study overall.

| Studies             | Q1 - Were patient's demographic characteristics clearly described? | Q2 - Was the patient's history clearly described and presented as a timeline? | Q3 - Was the current clinical condition of the patient on presentation clearly described? | Q4 - Were diagnostic tests or assessment methods and the results clearly described? | Q5 - Was the intervention(s) or treatment procedure(s) clearly described? | Q6 - Was the post-intervention clinical condition clearly described? | Q7 - Were adverse events (harms) or unanticipated events identified and described? | Q8 - Does the case report provide takeaway lessons? | Overall Assessment reflecting the quality of the study to address the specific aim of the review |
|---------------------|--------------------------------------------------------------------|-------------------------------------------------------------------------------|-------------------------------------------------------------------------------------------|-------------------------------------------------------------------------------------|---------------------------------------------------------------------------|----------------------------------------------------------------------|------------------------------------------------------------------------------------|-----------------------------------------------------|--------------------------------------------------------------------------------------------------|
| Abbas et al., 2021  | YES                                                                | NO                                                                            | YES                                                                                       | YES                                                                                 | YES                                                                       | YES                                                                  | YES                                                                                | YES                                                 | 7/8                                                                                              |
| Hare et al., 2021 * | YES                                                                | NO                                                                            | YES                                                                                       | YES                                                                                 | NO                                                                        | NO                                                                   | NO                                                                                 | YES                                                 | 4/8*                                                                                             |

- A case series that described more genomic sequencing more than the clinical aspects of the case

Supplementary Table 6: Results from the JBI critical appraisal tool for case series (n=1) : Results reflecting the quality of the study to address the specific aim of the review and not the study overall.

| First author, year    | Q1<br>Were there clear criteria for inclusion in the case series? | Q2<br>Was the condition measured in a standard, reliable way for all participants included in the case series? | Q3<br>Were valid methods used for identification of the condition for all participants included in the case series? | Q4<br>Did the case series have consecutive inclusion of participants? | Q5<br>Did the case series have complete inclusion of participants? | Q6<br>Was there clear reporting of the demographics of the participants in the study? | Q7<br>Was there clear reporting of clinical information of the participants? | Q8<br>Were the outcomes or follow up results of cases clearly reported? | Q9<br>Was there clear reporting of the presenting site(s)/clinic(s) demographic information? | Q10<br>Was statistical analysis appropriate? | Overall Assessment reflecting the quality of the study to address the specific aim of the review |
|-----------------------|-------------------------------------------------------------------|----------------------------------------------------------------------------------------------------------------|---------------------------------------------------------------------------------------------------------------------|-----------------------------------------------------------------------|--------------------------------------------------------------------|---------------------------------------------------------------------------------------|------------------------------------------------------------------------------|-------------------------------------------------------------------------|----------------------------------------------------------------------------------------------|----------------------------------------------|--------------------------------------------------------------------------------------------------|
| Kuwelker et al., 2021 | YES                                                               | YES                                                                                                            | YES                                                                                                                 | YES                                                                   | YES                                                                | YES                                                                                   | YES                                                                          | YES                                                                     | YES                                                                                          | YES                                          | 10/10                                                                                            |

Supplementary Table 7: Results from the JBI critical appraisal tool for case - control (n=1) : Results reflecting the quality of the study to address the specific aim of the review and not the study overall.

| First author, year   | Q1<br>Were the groups comparable other than the presence of disease in cases or the absence of disease in controls? | Q2<br>Were cases and controls matched appropriately? | Q3<br>Were the same criteria used for identification of cases and controls? | Q4<br>Was exposure measured in a standard, valid and reliable way? | Q5<br>Was exposure measured in the same way for cases and controls? | Q6<br>Were confounding factors identified? | Q7<br>Were strategies to deal with confounding factors stated? | Q8<br>Were outcomes assessed in a standard, valid and reliable way for cases and controls? | Q9<br>Was the exposure period of interest long enough to be meaningful? | Q10<br>Was appropriate statistical analysis used? | Overall Assessment reflecting the quality of the study to address the specific aim of the review |
|----------------------|---------------------------------------------------------------------------------------------------------------------|------------------------------------------------------|-----------------------------------------------------------------------------|--------------------------------------------------------------------|---------------------------------------------------------------------|--------------------------------------------|----------------------------------------------------------------|--------------------------------------------------------------------------------------------|-------------------------------------------------------------------------|---------------------------------------------------|--------------------------------------------------------------------------------------------------|
| Calvani et al., 2021 | YES                                                                                                                 | YES                                                  | YES                                                                         | YES                                                                | YES                                                                 | YES                                        | YES                                                            | YES                                                                                        | YES                                                                     | YES                                               | 10/10                                                                                            |
